# Supplementary material for: Genetic encoding of a highly photostable, long lifetime fluorescent amino acid for imaging in mammalian cells
Source: Chem Sci. 2021 Aug 3;12(36):11955–64. doi: 10.1039/d1sc01914g (PMC8634729; doi:10.1039/d1sc01914g)
Supplement: SC-012-D1SC01914G-s006 [file SC-012-D1SC01914G-s006.xlsx]

## Sheet: Sheet1
			5	10	12	15	18	22	23	30	32	33	41	44	50	55	57	64	65	67	68	69	74	75	78	82	84	93
Original	24 hrs	+AcR	305	182	30	361	392	650	151	2039	1108	275	629	598	811	836	1205	827	2419	2344	486	2215	335	1390	1707	3075	2436	810
		-AA	53	45	53	59	55	63	41	76	66	58	74	206	57	68	93	73	97	118	83	113	50	69	68	77	167	66
	48 hrs	+AcR	4870	1690	261	1760	3245	3083	1551	5290	6533	2128	5909	2160	1882	1944	2989	3204	7132	5334	3743	5409	2516	1546	2790	9055	7595	2200
		-AA	134	127	131	128	147	115	109	135	141	117	141	304	118	114	159	134	191	181	162	209	135	134	138	139	231	123
	72 hrs	+AcR	5202	1963	403	2594	3943	3733	1952	6473	7880	2573	7012	2833	2556	2532	3496	3886	9080	6695	5068	6126	3236	2096	4088	10432	8667	2605
		-AA	199	176	172	118	204	173	261	198	194	163	160	388	168	163	216	169	268	285	216	309	183	180	154	202	311	179
Redone	24 hrs	+AcR	689	538	430	430	383	1502	260	973	2263	393	1268	483	623	351	332	1266	2749	3853	659	2845	443	2321	1130	2128	1609	254
		-AA	87	121	98	114	106	128	101	115	121	92	131	241	96	98	110	84	125	125	97	128	103	80	59	78	104	80
		+nPF	125	61	126	92	65	68	60	68	81	66	255	119	75	57	64	295	1742	3458	1362	3974	61	280	327	159	110	62
	48 hrs	+AcR	1135	1066	528	558	667	2256	473	1543	3491	827	2362	923	1041	703	719	2290	4868	6269	1069	4455	978	4084	3523	4761	2205	358
		-AA	130	129	138	133	163	137	139	135	144	130	149	284	134	126	165	124	151	156	162	178	131	122	113	142	182	118
		+nPF	143	100	187	127	117	133	103	111	144	103	476	171	93	91	95	417	2389	5947	2516	5464	121	1630	3434	353	164	89
	72 hrs	+AcR	2169	1225	734	792	916	3001	610	1781	4693	1258	3564	1523	1635	1050	1032	2740	5980	8227	1380	4913	1274	5761	3324	4871	2752	461
		-AA	234	222	220	166	298	252	210	256	221	240	232	442	199	217	264	229	237	293	203	257	228	204	165	248	233	202
		+nPF	263	164	252	182	174	220	160	171	205	154	737	303	185	153	139	778	3731	8922	4310	7142	223	2509	3197	369	218	139
Average	24 hrs	+AcR	497	360	230	395.5	387.5	1076	205.5	1506	1685.5	334	948.5	540.5	717	593.5	768.5	1046.5	2584	3098.5	572.5	2530	389	1855.5	1418.5	2601.5	2022.5	532
		-AA	70	83	75.5	86.5	80.5	95.5	71	95.5	93.5	75	102.5	223.5	76.5	83	101.5	78.5	111	121.5	90	120.5	76.5	74.5	63.5	77.5	135.5	73
		+nPF	125	61	126	92	65	68	60	68	81	66	255	119	75	57	64	295	1742	3458	1362	3974	61	280	327	159	110	62
	48 hrs	+AcR	3002.5	1378	394.5	1159	1956	2669.5	1012	3416.5	5012	1477.5	4135.5	1541.5	1461.5	1323.5	1854	2747	6000	5801.5	2406	4932	1747	2815	3156.5	6908	4900	1279
		-AA	132	128	134.5	130.5	155	126	124	135	142.5	123.5	145	294	126	120	162	129	171	168.5	162	193.5	133	128	125.5	140.5	206.5	120.5
		+nPF	143	100	187	127	117	133	103	111	144	103	476	171	93	91	95	417	2389	5947	2516	5464	121	1630	3434	353	164	89
	72 hrs	+AcR	3685.5	1594	568.5	1693	2429.5	3367	1281	4127	6286.5	1915.5	5288	2178	2095.5	1791	2264	3313	7530	7461	3224	5519.5	2255	3928.5	3706	7651.5	5709.5	1533
		-AA	216.5	199	196	142	251	212.5	235.5	227	207.5	201.5	196	415	183.5	190	240	199	252.5	289	209.5	283	205.5	192	159.5	225	272	190.5
		+nPF	263	164	252	182	174	220	160	171	205	154	737	303	185	153	139	778	3731	8922	4310	7142	223	2509	3197	369	218	139
Standard Deviation	24 hrs	+AcR	271.529	251.73	282.843	48.7904	6.36396	602.455	77.0746	753.776	816.708	83.4386	451.841	81.3173	132.936	342.947	617.304	310.42	233.345	1067.02	122.329	445.477	76.3675	658.316	408.001	669.63	584.777	393.151
		-AA	50.9117	11.3137	51.6188	23.3345	7.07107	3.53553	13.435	5.65685	10.6066	5.65685	127.986	61.5183	27.5772	21.2132	12.0208	7.77817	19.799	4.94975	9.89949	10.6066	37.4767	7.77817	6.36396	0.707107	44.5477	9.89949
	48 hrs	+AcR	2641.04	441.235	188.798	849.942	1822.92	584.777	762.261	2649.53	2151.02	919.946	2508.11	874.691	594.677	877.52	1605.13	646.296	1600.89	661.145	1890.8	674.58	1087.53	1794.64	518.309	3036.32	3811.31	1302.49
		-AA	6.36396	19.0919	39.598	0.707107	21.2132	12.7279	4.24264	16.9706	2.12132	9.89949	236.881	94.0452	11.3137	8.48528	4.24264	7.07107	28.2843	17.6777	0	21.9203	2.82843	8.48528	17.6777	2.12132	34.6482	3.53553
	72 hrs	+AcR	2144.65	521.845	234.052	1274.21	2140.41	517.602	948.937	3317.75	2253.55	929.845	2438.1	926.31	651.245	1047.93	1742.31	810.344	2192.03	1083.29	2607.81	857.721	1387.34	2591.55	540.23	3932.22	4182.54	1516.04
		-AA	45.2548	8.48528	56.5685	45.2548	21.2132	33.234	71.4178	19.0919	7.77817	6.36396	408.001	60.1041	21.9203	38.1838	33.9411	42.4264	21.9203	5.65685	9.19239	36.7696	31.8198	16.9706	7.77817	32.5269	55.1543	16.2635
