# Supplementary material for: Genetic encoding of a highly photostable, long lifetime fluorescent amino acid for imaging in mammalian cells
Source: Chem Sci. 2021 Aug 3;12(36):11955–64. doi: 10.1039/d1sc01914g (PMC8634729; doi:10.1039/d1sc01914g)
Supplement: SC-012-D1SC01914G-s007 [file SC-012-D1SC01914G-s007.xlsx]

## Sheet: Sheet1
Wavelength	H2O_Incident	H2O_Sample	DMSO_Incident	DMSO_Sample	MeOH_Incident	MeOH_Sample	THF_Incident	THF_Sample
350			1.63484	1.53347
351			1.903	1.77641
352			3.56241	3.29799
353			12.426	11.2807
354			46.5633	42.2088
355			139.59	126.542
356			335.715	304.571
357			677.096	613.171
358			1188.52	1074
359			1860.93	1676.93
360			2641.83	2371.28
361			3442.97	3079.18
362			4152.66	3705.55
363			4680.68	4172.85
364			4971.39	4429.85
365			4994.74	4447.55
366			4743.23	4220.1
367			4250.98	3777.89
368			3568.22	3166.33
369			2778.68	2464.05
370	1.18299	0.852349	1985.02	1760.24	1.39659	1.03902	1.55588	1.25909
371	1.4199	1.01123	1280.48	1135.35	1.63976	1.16871	1.792	1.41944
372	2.81037	1.89141	731.979	647.209	3.03035	1.96237	3.11529	2.36848
373	10.4546	6.68669	361.147	317.423	10.6897	6.3074	10.5929	7.5579
374	41.5001	26.1642	151.718	132.475	41.7628	24.023	41.4129	28.8319
375	128.966	80.4348	52.8047	45.9909	129.015	73.5712	128.229	88.4374
376	317.688	196.191	14.2242	12.2004	317.371	180.556	315.715	216.357
377	652.369	400.522	4.12518	3.31202	651.68	371.483	648.571	442.387
378	1161.35	711.75	2.64828	1.92301	1160.82	663.236	1155.02	786.648
379	1841.43	1125.17	2.593	1.71979	1841.6	1053.88	1831.27	1247.5
380	2640.09	1605.68	2.66965	1.59188	2639.65	1512.64	2625.28	1786.79
381	3467.06	2099.88	2.80334	1.47707	3467.09	1989.97	3449.28	2345.47
382	4210.16	2540.49	2.99359	1.38011	4214.62	2422.58	4191.93	2850.51
383	4778.92	2872.72	3.2529	1.309	4785.14	2754.22	4759.43	3238.04
384	5113.83	3060.97	3.5833	1.25851	5118.98	2948.52	5093.22	3462.97
385	5173.97	3084.89	3.9602	1.22784	5177.26	2984.57	5154.12	3499.18
386	4946.38	2941.07	4.36798	1.21855	4948.88	2856.27	4927.42	3342.55
387	4462.78	2646.39	4.79456	1.22791	4465.14	2580.29	4445.76	3015.49
388	3773.61	2229.8	5.19788	1.24351	3775.97	2186.19	3758.9	2548.69
389	2965.09	1746.51	5.58387	1.26268	2968.8	1721.94	2952.52	2001.43
390	2141.48	1257.15	5.90577	1.28787	2145.95	1247.08	2129.62	1444.83
391	1399.35	819.38	6.19134	1.30526	1400.07	816.984	1388.27	944.224
392	811.532	473.901	6.40649	1.32205	810.032	476.497	802.915	547.69
393	407.46	237.398	6.54272	1.34249	405.919	241.979	401.945	274.82
394	174.463	101.604	6.61526	1.36557	173.743	106.24	171.361	118.571
395	61.98	36.7476	6.62404	1.37204	61.7922	40.1824	60.4833	43.8707
396	16.3823	10.7149	6.57654	1.38059	16.387	14.0304	16.1477	14.0648
397	3.70389	3.7729	6.47679	1.38427	3.88324	7.86424	3.94443	6.4405
398	1.59856	3.07714	6.33054	1.39421	1.81967	8.40836	1.97329	5.93926
399	1.29675	3.60359	6.17357	1.4053	1.53849	10.5821	1.7052	6.76362
400	1.1208	4.42038	5.9888	1.41642	1.3709	13.4367	1.54443	7.78932
401	0.974716	5.54681	5.81451	1.42038	1.21653	17.0944	1.40066	8.95151
402	0.841847	7.12464	5.65533	1.41463	1.08338	21.7054	1.26827	10.2554
403	0.727316	9.23649	5.50935	1.40942	0.977392	27.4125	1.15693	11.6502
404	0.650894	12.0152	5.38385	1.40849	0.898756	34.2925	1.07399	13.1413
405	0.592073	15.6278	5.30053	1.42009	0.844962	42.4261	1.01565	14.656
406	0.561756	20.2681	5.25055	1.42267	0.805281	52.024	0.973916	16.1445
407	0.547571	26.1881	5.23566	1.44247	0.798816	63.0451	0.963553	17.6005
408	0.565689	33.5276	5.24225	1.44821	0.79792	75.3672	0.958197	18.9694
409	0.583519	42.5432	5.30499	1.46607	0.799898	88.9266	0.960541	20.2063
410	0.603405	53.3713	5.37009	1.47366	0.824737	103.363	0.971803	21.2377
411	0.627002	65.9773	5.44705	1.49418	0.831774	118.317	0.986623	22.0765
412	0.640239	80.4373	5.53672	1.51976	0.837378	133.314	0.992838	22.7297
413	0.653441	96.7809	5.60011	1.53718	0.840365	147.881	1.0016	23.1583
414	0.669496	114.872	5.67139	1.54445	0.848059	161.705	1.01477	23.3923
415	0.683498	134.053	5.72378	1.54406	0.852509	174.354	1.02815	23.4859
416	0.69813	153.944	5.75039	1.54777	0.8601	185.314	1.04222	23.4089
417	0.705788	173.875	5.74384	1.55195	0.860624	194.212	1.04692	23.1976
418	0.708558	193.357	5.69987	1.55242	0.862911	200.893	1.05357	23.0038
419	0.712238	211.664	5.60836	1.56418	0.861495	205.403	1.06098	22.7563
420	0.712713	227.899	5.50881	1.57146	0.862807	207.727	1.05779	22.4966
421	0.717702	241.392	5.3811	1.5837	0.866014	207.865	1.06812	22.2508
422	0.729667	252.197	5.23488	1.60391	0.869586	206.65	1.06666	22.069
423	0.723815	259.879	5.08108	1.63988	0.870283	204.17	1.07635	21.9688
424	0.73234	264.542	4.92504	1.68658	0.875627	200.772	1.07501	21.9037
425	0.733676	266.649	4.75636	1.74074	0.878185	196.916	1.0754	21.9833
426	0.736312	266.345	4.59106	1.80729	0.880651	193.046	1.0828	22.1489
427	0.7334	264.039	4.42907	1.88984	0.889836	189.377	1.09985	22.3156
428	0.737793	260.105	4.27735	2.00295	0.89999	186.22	1.11706	22.5382
429	0.733788	255.632	4.13473	2.15332	0.914245	184.082	1.14746	22.8411
430	0.74852	250.997	3.98593	2.32653	0.929459	182.922	1.16447	23.1347
431	0.740101	246.643	3.85268	2.57116	0.944148	182.459	1.1859	23.3717
432	0.748863	242.768	3.74949	2.87549	0.954724	182.925	1.19883	23.5974
433	0.75166	240.036	3.6273	3.25517	0.968093	184.149	1.21821	23.798
434	0.763255	238.417	3.53075	3.73113	0.982146	186.117	1.22678	23.8843
435	0.773857	238.223	3.42881	4.31545	0.986539	188.475	1.22857	23.8988
436	0.784298	239.656	3.36789	5.03098	0.996384	191.318	1.2291	23.7961
437	0.792143	242.45	3.29276	5.89644	0.995942	194.061	1.2233	23.5948
438	0.799444	246.591	3.24767	6.91017	0.993889	196.589	1.21351	23.2873
439	0.803171	251.758	3.21421	8.09626	0.994218	198.693	1.2022	22.8944
440	0.816799	257.56	3.1704	9.43302	0.993429	200.275	1.17583	22.4302
441	0.829319	263.674	3.12371	10.9231	0.987695	200.891	1.15702	21.8428
442	0.832731	269.68	3.10347	12.5905	0.97672	200.581	1.14473	21.1973
443	0.833551	275.204	3.07532	14.404	0.959908	199.252	1.13839	20.5153
444	0.830821	280.054	3.0327	16.325	0.947554	197.121	1.13068	19.8245
445	0.82865	283.705	2.99456	18.3552	0.935843	193.815	1.11483	19.1586
446	0.820932	285.949	2.95472	20.4091	0.933783	189.586	1.10952	18.475
447	0.810272	286.663	2.90512	22.5182	0.922606	184.574	1.09278	17.816
448	0.793651	285.815	2.86292	24.5996	0.904951	179.159	1.09313	17.2143
449	0.782396	283.478	2.8105	26.5418	0.894729	173.245	1.0868	16.6486
450	0.756083	279.306	2.76124	28.2936	0.886945	166.909	1.07775	16.1458
451	0.736117	273.807	2.70637	29.8062	0.8909	160.289	1.07219	15.6612
452	0.718117	267.326	2.65287	31.0981	0.886763	153.757	1.06502	15.2173
453	0.708464	259.622	2.62497	32.1274	0.890705	147.379	1.05361	14.8612
454	0.69938	251.361	2.56248	32.7935	0.886659	141.192	1.04853	14.5264
455	0.695728	242.514	2.50797	33.1024	0.880362	135.348	1.04739	14.215
456	0.688452	233.567	2.44441	33.1065	0.896772	129.796	1.04507	13.9668
457	0.681881	224.635	2.39976	32.8325	0.896396	124.842	1.0439	13.7348
458	0.670116	215.941	2.36495	32.3659	0.895928	120.276	1.03527	13.4949
459	0.670496	207.687	2.29736	31.7075	0.894129	116.251	1.03935	13.294
460	0.669963	199.826	2.24374	30.997	0.893519	112.75	1.03414	13.071
461	0.658706	192.581	2.19052	30.1419	0.894996	109.601	1.03344	12.8344
462	0.654058	185.887	2.13252	29.2993	0.898924	106.714	1.03469	12.5961
463	0.644792	179.944	2.08835	28.4621	0.896451	104.301	1.03208	12.3666
464	0.638097	174.737	2.05285	27.758	0.900545	102.139	1.03199	12.1185
465	0.635275	170.394	2.00621	27.1144	0.896537	100.338	1.03628	11.8522
466	0.620732	166.652	1.95096	26.5536	0.910315	98.71	1.03656	11.5769
467	0.625947	163.663	1.9326	26.1196	0.912355	97.2722	1.04583	11.3068
468	0.621978	161.224	1.90407	25.8112	0.908704	95.7467	1.04214	11.0384
469	0.617289	159.081	1.86808	25.6064	0.915368	94.2768	1.04805	10.7928
470	0.605281	157.237	1.84853	25.5537	0.912169	92.695	1.04588	10.4968
471	0.599291	155.522	1.83342	25.631	0.904016	90.9235	1.05196	10.2158
472	0.59653	153.943	1.82597	25.8827	0.897943	89.0984	1.05105	9.90917
473	0.591518	152.47	1.83045	26.3183	0.902687	87.1365	1.05678	9.6395
474	0.602173	150.696	1.84343	26.9005	0.896823	84.9507	1.06282	9.37654
475	0.6002	148.699	1.85704	27.6722	0.891809	82.5525	1.06752	9.09201
476	0.599605	146.389	1.85914	28.5425	0.88378	79.8959	1.07184	8.83215
477	0.601128	143.873	1.882	29.4961	0.88695	77.2496	1.06819	8.55811
478	0.596042	140.932	1.91074	30.4219	0.887558	74.4015	1.0717	8.31168
479	0.59642	137.64	1.92373	31.3401	0.884167	71.4256	1.07156	8.09497
480	0.596637	133.963	1.93396	32.2223	0.882052	68.5088	1.07332	7.8619
481	0.585823	130.063	1.94155	33.0175	0.883888	65.6169	1.06549	7.64394
482	0.581639	125.946	1.96982	33.6851	0.874078	62.6442	1.06591	7.43642
483	0.585576	121.685	1.97037	34.1501	0.877942	59.7441	1.06592	7.24555
484	0.57298	117.249	1.97636	34.3978	0.866017	56.9462	1.07276	7.06881
485	0.569623	112.616	1.96789	34.4414	0.87422	54.238	1.075	6.8947
486	0.565894	107.852	1.95502	34.2766	0.872581	51.6338	1.0731	6.72933
487	0.565715	103.275	1.92921	33.9042	0.871683	49.1727	1.07706	6.53895
488	0.566316	98.665	1.90475	33.3712	0.871725	46.8142	1.07948	6.3605
489	0.563236	94.3305	1.88649	32.6965	0.872726	44.625	1.08664	6.20949
490	0.555802	90.0272	1.84907	31.9268	0.884177	42.5839	1.08999	6.04386
491	0.548369	86.069	1.83408	31.1351	0.888672	40.7666	1.09109	5.89969
492	0.549686	82.3371	1.81436	30.2178	0.898452	39.0418	1.09179	5.78315
493	0.549316	78.9945	1.79082	29.2781	0.925799	37.5653	1.10549	5.67523
494	0.543524	75.9827	1.75916	28.3088	0.940223	36.2906	1.12466	5.58469
495	0.541014	73.2527	1.73175	27.3639	0.953153	35.1351	1.14352	5.51323
496	0.53715	70.8215	1.7087	26.4097	0.974653	34.1274	1.18196	5.45755
497	0.541841	68.5338	1.69268	25.4757	1.00105	33.1674	1.20508	5.39871
498	0.55412	66.3803	1.67621	24.5497	1.01314	32.2601	1.22987	5.31019
499	0.554225	64.3154	1.63812	23.6199	1.02474	31.3951	1.26134	5.2309
500	0.553775	62.3253	1.6198	22.7916	1.04565	30.5408	1.29491	5.16423
501	0.568894	60.4655	1.5837	22.0604	1.07558	29.7431	1.31927	5.06347
502	0.569461	58.7762	1.55314	21.3311	1.07789	28.921	1.33555	4.96172
503	0.579112	57.2512	1.53292	20.6792	1.08351	28.126	1.35335	4.84663
504	0.589853	55.736	1.51492	20.0871	1.08447	27.3109	1.35764	4.73734
505	0.585815	54.1629	1.47867	19.5699	1.0794	26.4898	1.36661	4.62173
506	0.573012	52.6313	1.4663	19.1552	1.07682	25.6777	1.35731	4.52817
507	0.586328	51.0743	1.44471	18.7954	1.07096	24.7995	1.34268	4.42063
508	0.586118	49.6317	1.43558	18.5044	1.05178	23.9577	1.33351	4.30723
509	0.587931	48.2784	1.41674	18.2382	1.04302	23.1173	1.3213	4.23045
510	0.578932	46.9461	1.4183	18.0404	1.02403	22.2629	1.31487	4.12602
511	0.571835	45.5885	1.40464	17.9244	1.00939	21.4543	1.31106	4.05677
512	0.566468	44.2112	1.39793	17.8455	1.01309	20.6452	1.30382	3.95825
513	0.555246	42.8572	1.37657	17.7068	1.01336	19.8504	1.27898	3.89468
514	0.551686	41.6072	1.38959	17.6267	0.996215	19.0743	1.27534	3.8133
515	0.533026	40.3225	1.38944	17.5779	0.979245	18.3222	1.27155	3.74784
516	0.523839	38.9636	1.37436	17.5132	0.977407	17.5871	1.25481	3.66169
517	0.503809	37.6041	1.36372	17.4353	0.976653	16.8793	1.24971	3.60406
518	0.502097	36.2522	1.34714	17.3734	0.964941	16.1763	1.2396	3.54044
519	0.489875	34.9228	1.34885	17.252	0.947845	15.4845	1.23089	3.48576
520	0.470634	33.5509	1.34162	17.1794	0.945828	14.8293	1.22244	3.42113
521	0.463923	32.1932	1.24127	17.0217	0.927159	14.2122	1.23015	3.34936
522	0.455436	30.8638	1.23249	16.8658	0.917185	13.5826	1.21299	3.27382
523	0.447873	29.546	1.23574	16.6414	0.914558	12.9527	1.20978	3.19024
524	0.447198	28.3437	1.22562	16.3585	0.922287	12.3827	1.20256	3.11232
525	0.428962	27.1628	1.22119	16.0823	0.912454	11.8017	1.19698	3.05605
526	0.415155	25.9928	1.21747	15.7517	0.899277	11.2897	1.17807	2.99323
527	0.414493	24.8631	1.21627	15.4315	0.895324	10.8101	1.15877	2.93764
528	0.413375	23.7741	1.21373	15.0813	0.893065	10.3504	1.14066	2.8784
529	0.41342	22.7854	1.20451	14.7077	0.873663	9.92827	1.12667	2.83239
530	0.407405	21.8577	1.21336	14.2791	0.860911	9.51362	1.11809	2.76844
531	0.393469	21.0003	1.21568	13.8648	0.864712	9.16605	1.10798	2.72769
532	0.386396	20.1589	1.21115	13.4354	0.861437	8.84649	1.10375	2.68711
533	0.399659	19.3695	1.21628	12.9912	0.852122	8.55632	1.09835	2.63396
534	0.393856	18.657	1.20897	12.5671	0.857039	8.28816	1.08898	2.58771
535	0.395355	17.9811	1.21433	12.148	0.849237	8.02328	1.08431	2.52719
536	0.381398	17.3636	1.20922	11.6911	0.841353	7.7861	1.0869	2.48143
537	0.378675	16.7709	1.20898	11.2833	0.850851	7.57728	1.07324	2.44576
538	0.369882	16.2065	1.21855	10.8897	0.861855	7.354	1.06734	2.42708
539	0.373686	15.6818	1.21474	10.5132	0.859932	7.13884	1.06333	2.37704
540	0.374524	15.2247	1.22737	10.1617	0.847691	6.95442	1.05072	2.3494
541	0.328828	14.5791	1.22465	9.83782	0.774571	6.75742	1.02846	2.25058
542	0.322637	14.1762	1.22754	9.54645	0.776478	6.57087	1.03248	2.21869
543	0.313636	13.7262	1.21927	9.23851	0.772328	6.37656	1.03951	2.1844
544	0.309779	13.303	1.23432	8.98389	0.782765	6.19625	1.03593	2.1394
545	0.301755	12.8848	1.24218	8.72011	0.782246	6.02601	1.02578	2.12168
546	0.303331	12.4813	1.22947	8.49607	0.793022	5.85267	1.02278	2.09193
547	0.314498	12.0767	1.23593	8.27765	0.792802	5.68319	1.02624	2.06096
548	0.324217	11.7107	1.23906	8.10443	0.801791	5.51355	1.02459	2.02873
549	0.333506	11.3714	1.24272	7.92256	0.797919	5.34345	1.02964	1.9936
550	0.334644	11.0276	1.26509	7.7415	0.781224	5.16421	1.03626	1.96182
551	0.331993	10.6812	1.2651	7.59901	0.79129	4.99801	1.03375	1.95261
552	0.334952	10.3365	1.27528	7.45412	0.788203	4.85886	1.0271	1.94532
553	0.330922	9.99771	1.27073	7.3491	0.785039	4.71779	1.02786	1.92407
554	0.32827	9.6872	1.27952	7.2317	0.776889	4.54773	1.03457	1.90271
555	0.327817	9.38087	1.28626	7.11845	0.779781	4.40781	1.03996	1.88152
556	0.319958	9.07412	1.28329	7.0095	0.784131	4.26927	1.0381	1.8652
557	0.307401	8.74123	1.28097	6.91636	0.775592	4.14752	1.03799	1.85204
558	0.307514	8.40748	1.26937	6.81559	0.775095	4.01852	1.037	1.8426
559	0.304882	8.11265	1.29227	6.72097	0.772492	3.88596	1.04648	1.81924
560	0.309455	7.81069	1.29096	6.65115	0.760157	3.7578	1.05015	1.78804
561	0.311321	7.53642	1.29546	6.57545	0.755454	3.63345	1.05911	1.76166
562	0.319328	7.27467	1.31848	6.50017	0.773533	3.54328	1.05692	1.75403
563	0.319497	7.01188	1.32412	6.42356	0.782411	3.45064	1.05687	1.7391
564	0.311521	6.72339	1.33874	6.33066	0.777688	3.35131	1.06663	1.72264
565	0.31013	6.48628	1.36202	6.2428	0.773748	3.24421	1.07697	1.71678
566	0.298398	6.26143	1.38277	6.13599	0.787854	3.14525	1.08518	1.7089
567	0.297097	6.02635	1.3777	6.0587	0.783485	3.07164	1.07776	1.6998
568	0.295856	5.80737	1.39397	5.97384	0.797612	3.00235	1.08642	1.70426
569	0.286237	5.58727	1.39714	5.87372	0.806327	2.91149	1.0885	1.70543
570	0.28651	5.36643	1.39777	5.76513	0.79646	2.82906	1.09237	1.69867
571	0.281919	5.14957	1.40668	5.6733	0.787769	2.76766	1.09715	1.70292
572	0.288542	4.98494	1.39995	5.56702	0.790821	2.67847	1.10142	1.69382
573	0.284458	4.81844	1.39584	5.44723	0.799051	2.60893	1.10049	1.68502
574	0.303594	4.66015	1.39894	5.37197	0.799563	2.56695	1.10439	1.66771
575	0.292727	4.50244	1.41324	5.26447	0.806967	2.50627	1.10901	1.66942
576	0.308257	4.35054	1.41842	5.15758	0.80577	2.45716	1.10448	1.64402
577	0.313139	4.20343	1.44536	5.05136	0.820611	2.41846	1.11593	1.63168
578	0.318045	4.04863	1.45371	4.93805	0.822319	2.36967	1.11332	1.62219
579	0.325773	3.93048	1.46556	4.81593	0.850253	2.30889	1.11678	1.60321
580	0.322868	3.79389	1.48911	4.71726	0.871258	2.27707	1.11548	1.6065
581	0.326972	3.66655	1.49745	4.6252	0.873449	2.24843	1.12133	1.60121
582	0.319401	3.54901	1.49892	4.50427	0.866956	2.19804	1.13743	1.61707
583	0.329827	3.42874	1.5059	4.42296	0.867052	2.17117	1.13966	1.62471
584	0.329703	3.33925	1.51092	4.32292	0.870189	2.15023	1.14452	1.62086
585	0.322336	3.23029	1.51894	4.24255	0.878965	2.10922	1.15969	1.62383
586	0.331806	3.14657	1.53099	4.16829	0.887323	2.0821	1.16767	1.62369
587	0.310525	3.05077	1.54805	4.10303	0.869667	2.04888	1.16979	1.62334
588	0.331277	2.96375	1.56487	4.04123	0.862873	2.02139	1.19759	1.60997
589	0.329102	2.89592	1.56826	3.9675	0.865266	1.98529	1.20649	1.59729
590	0.342556	2.8271	1.58706	3.89275	0.881512	1.95857	1.20521	1.597
591	0.332077	2.76573	1.59053	3.83269	0.887613	1.92417	1.21462	1.58097
592	0.330171	2.6988	1.61927	3.75985	0.894098	1.87623	1.22303	1.58596
593	0.323623	2.61446	1.61582	3.69788	0.899664	1.84843	1.23249	1.59142
594	0.319932	2.56146	1.65033	3.6541	0.90068	1.82358	1.24832	1.58429
595	0.332108	2.49033	1.67255	3.61681	0.913208	1.79423	1.24963	1.60554
596	0.324237	2.44456	1.68739	3.58943	0.933103	1.77355	1.24406	1.61654
597	0.328999	2.37307	1.7056	3.54666	0.938568	1.78037	1.25722	1.62644
598	0.328681	2.31715	1.72293	3.50333	0.940674	1.76828	1.27389	1.6219
599	0.329971	2.24125	1.74221	3.46011	0.951507	1.76143	1.27152	1.63028
600	0.342446	2.16644	1.74046	3.44401	0.958644	1.76206	1.27958	1.63861
601	0.358335	2.12763	1.76038	3.40367	0.961483	1.75136	1.28988	1.65606
602	0.366144	2.05681	1.75239	3.36661	0.9637	1.74018	1.28466	1.67324
603	0.37716	1.9923	1.75417	3.33548	0.971583	1.72496	1.30996	1.65083
604	0.375594	1.92837	1.75826	3.31386	0.95339	1.72349	1.31854	1.64658
605	0.384288	1.87804	1.76511	3.32286	0.959296	1.6885	1.31693	1.6576
606	0.3865	1.80978	1.77406	3.3217	0.966301	1.69264	1.31388	1.64506
607	0.400075	1.75195	1.80445	3.30713	0.965045	1.69271	1.33529	1.63829
608	0.384112	1.71407	1.80826	3.29131	0.981153	1.66965	1.35861	1.63696
609	0.369112	1.65407	1.84164	3.29155	0.982084	1.66514	1.36678	1.6289
610	0.380511	1.61075	1.85351	3.2862	0.994476	1.66114	1.39376	1.63028
611	0.37745	1.58591	1.86987	3.30443	1.00661	1.65527	1.40718	1.63006
612	0.39523	1.55331	1.89855	3.2661	1.03094	1.63791	1.4126	1.66019
613	0.387041	1.51082	1.92289	3.2095	1.03514	1.63779	1.42422	1.66603
614	0.395465	1.49691	1.97003	3.19333	1.04591	1.61942	1.44896	1.70042
615	0.386944	1.47739	1.97298	3.18735	1.06185	1.59384	1.45147	1.73207
616	0.389184	1.44525	2.01209	3.18111	1.06595	1.61651	1.4458	1.73377
617	0.389562	1.41991	2.01876	3.1582	1.07399	1.59404	1.46416	1.74641
618	0.377502	1.38913	2.0206	3.15007	1.08675	1.57381	1.45411	1.7508
619	0.357118	1.35639	2.04021	3.12522	1.10327	1.57757	1.45813	1.76798
620	0.352016	1.32221	2.05022	3.12427	1.11613	1.57158	1.49168	1.74598
621	0.350831	1.29084	2.06769	3.16021	1.12793	1.55894	1.4866	1.74416
622	0.359889	1.25793	2.06582	3.15816	1.13276	1.56111	1.47632	1.74649
623	0.359564	1.23246	2.08504	3.17452	1.13713	1.55205	1.52394	1.74203
624	0.376755	1.20821	2.09515	3.18534	1.13318	1.53647	1.55576	1.76321
625	0.395545	1.18962	2.11519	3.18436	1.13702	1.54796	1.53822	1.76611
626	0.393514	1.16432	2.14549	3.17816	1.15096	1.55094	1.56169	1.77215
627	0.410418	1.15113	2.17738	3.20225	1.1404	1.53404	1.59519	1.78495
628	0.397826	1.1311	2.21317	3.21189	1.1408	1.54252	1.60411	1.80947
629	0.408468	1.11071	2.2335	3.20244	1.15739	1.5603	1.62925	1.82431
630	0.405302	1.09261	2.25621	3.20456	1.15251	1.53539	1.65366	1.83863
