# Supplementary material for: Genetic encoding of a highly photostable, long lifetime fluorescent amino acid for imaging in mammalian cells
Source: Chem Sci. 2021 Aug 3;12(36):11955–64. doi: 10.1039/d1sc01914g (PMC8634729; doi:10.1039/d1sc01914g)
Supplement: SC-012-D1SC01914G-s009 [file SC-012-D1SC01914G-s009.xlsx]

## Sheet: Sheet1
Wavelength	H2O_Incident	H2O_Sample	H2O_Incident	H2O_Sample	MeOH_Incident	MeOH_Sample
350	1.04013	0.913318	1.1445	1.36501	-0.12992	-0.26053
351	1.53689	1.35118	1.61603	1.87515	-0.096	-0.25017
352	4.25191	3.72373	4.20777	4.35055	-0.03966	-0.23029
353	17.3874	15.3397	16.6504	15.9417	0.0456	-0.21009
354	61.7708	54.9429	58.5869	55.3621	0.159095	-0.1668
355	175.998	156.98	166.771	157.687	0.297264	-0.11066
356	407.939	364.98	386.662	367.044	0.464704	-0.05124
357	801.535	719.593	761.102	725.244	0.646683	0.016896
358	1370.98	1235.19	1304.33	1248.22	1.01044	0.152159
359	2100.52	1899.01	2001.67	1921.95	2.51169	0.683016
360	2936.48	2661.7	2798.6	2696.93	11.3801	3.83683
361	3895.72	3532.41	3710.5	3576.85	46.0752	16.1713
362	4421.35	4014.1	4212.22	4068.73	133.971	47.4664
363	4896.87	4449.77	4667.26	4516.59	329.897	117.385
364	5123.77	4658.64	4883.43	4734.4	678.554	242.348
365	5074.57	4618.09	4835.72	4697.05	1204.81	432.025
366	4760.16	4336.56	4536.82	4413.79	1892.89	681.155
367	4208.36	3837.26	4010.09	3910.4	2693.79	971.468
368	3482.83	3178.1	3317.45	3244.73	3511.03	1270.17
369	2672.99	2440.42	2546.03	2498.06	4233.05	1535.73
370	1878.62	1718.9	1792.34	1764.71	4766.99	1734.3
371	1192.96	1093.69	1139.14	1128.34	5062.85	1846.84
372	671.165	615.008	640.308	639.434	5093.02	1862.71
373	324.049	296.13	309.043	311.578	4850.53	1777.92
374	130.779	119.212	124.967	128.429	4356.69	1599.67
375	42.3138	38.7075	40.6449	44.6849	3668.07	1350.07
376	11.3633	10.5382	11.0689	15.4679	2870.22	1060.71
377	2.71281	2.60979	2.84308	7.3648	2062.25	764.995
378	1.25874	1.30461	1.47701	6.07108	1339.3	498.956
379	1.00143	1.08036	1.22911	5.88506	774.049	289.986
380	0.816971	0.930809	1.06629	5.77174	389.758	147.278
381	0.656562	0.788153	0.914687	5.68513	167.169	64.0056
382	0.526734	0.670662	0.781549	5.59152	55.9975	21.6447
383	0.412504	0.581649	0.676491	5.53548	14.0267	5.53275
384	0.331554	0.514593	0.600392	5.49329	2.89234	1.21072
385	0.277017	0.48285	0.555196	5.46784	1.05232	0.527385
386	0.246199	0.474064	0.528864	5.46603	0.772483	0.47155
387	0.231824	0.46944	0.518568	5.48228	0.598154	0.48089
388	0.225876	0.476893	0.520969	5.50098	0.444878	0.498337
389	0.226984	0.501173	0.520476	5.51443	0.299507	0.562014
390	0.2321	0.541395	0.528959	5.53376	0.191649	0.671212
391	0.235065	0.576958	0.535229	5.55304	0.105651	0.819613
392	0.239189	0.628155	0.542254	5.56091	0.047319	1.02563
393	0.245683	0.679166	0.421258	5.55947	0.015833	1.30709
394	0.252136	0.744976	0.424771	5.58153	0.009758	1.67359
395	0.256461	0.819152	0.43876	5.58611	0.011841	2.10209
396	0.271784	0.905418	0.454189	5.60825	0.018215	2.62868
397	0.287889	1.02339	0.457543	5.65486	0.016953	3.28208
398	0.300706	1.1553	0.453277	5.6945	0.027002	4.07463
399	0.308672	1.29668	0.463644	5.72569	0.032202	5.03291
400	0.319789	1.46719	0.431032	5.77437	0.041346	6.16779
401	0.342614	1.67135	0.405749	5.87455	0.057331	7.48637
402	0.355641	1.90498	0.382382	5.99292	0.077829	9.08111
403	0.375326	2.18269	0.386777	6.1029	0.083173	10.9481
404	0.400896	2.49645	0.381417	6.22156	0.097135	13.1338
405	0.415516	2.84459	0.367665	6.34462	0.105247	15.6674
406	0.445583	3.24737	0.377349	6.45819	0.129544	18.5151
407	0.470827	3.68232	0.379188	6.58262	0.142429	21.8222
408	0.505105	4.16316	0.401727	6.69699	0.161454	25.5318
409	0.535819	4.73841	0.435623	6.78989	0.187608	29.7403
410	0.564299	5.36042	0.465062	6.83492	0.201648	34.5502
411	0.599495	6.03334	0.471496	6.8297	0.210461	39.8474
412	0.635884	6.78043	0.474239	6.84232	0.235941	45.6469
413	0.653188	7.56998	0.471596	6.80971	0.249498	52.0682
414	0.667511	8.44211	0.471171	6.74657	0.267737	59.1696
415	0.681858	9.36565	0.481869	6.66254	0.291297	66.8658
416	0.684901	10.3787	0.488478	6.5605	0.306975	75.1596
417	0.686476	11.4603	0.490954	6.45611	0.317758	84.0039
418	0.686589	12.6075	0.459892	6.34458	0.319706	93.4578
419	0.674688	13.84	0.485561	6.22333	0.325911	103.379
420	0.656158	15.124	0.492954	6.09134	0.329164	113.795
421	0.638332	16.4807	0.486351	5.96523	0.323316	124.754
422	0.627927	17.8962	0.492824	5.83585	0.318754	135.983
423	0.622334	19.3702	0.48142	5.71347	0.309409	147.506
424	0.616554	20.9491	0.512784	5.61392	0.304103	159.445
425	0.616245	22.5687	0.519949	5.49709	0.299095	171.626
426	0.602332	24.2351	0.53328	5.40241	0.290836	183.74
427	0.60091	25.9077	0.528185	5.32459	0.286073	195.88
428	0.602816	27.633	0.537094	5.27091	0.283833	208.136
429	0.609057	29.4026	0.545642	5.22481	0.276139	220.62
430	0.613797	31.1869	0.562755	5.17784	0.275476	232.92
431	0.616927	33.0081	0.584747	5.13913	0.273888	244.979
432	0.622876	34.8647	0.581729	5.09612	0.277983	256.869
433	0.622863	36.6483	0.569281	5.04364	0.279672	268.425
434	0.6235	38.3627	0.5663	5.00314	0.28126	279.479
435	0.636246	40.1536	0.538274	4.95501	0.283559	290.362
436	0.631869	41.892	0.511836	4.89014	0.288867	300.899
437	0.631149	43.5857	0.523259	4.81019	0.283426	310.751
438	0.628833	45.2139	0.532296	4.74007	0.283818	320.135
439	0.629053	46.827	0.517266	4.66156	0.283454	329.181
440	0.618287	48.326	0.555047	4.56289	0.277512	337.71
441	0.61029	49.6944	0.421258	4.46166	0.274938	345.303
442	0.6124	51.0455	0.424771	4.35475	0.274546	352.243
443	0.60003	52.275	0.43876	4.2587	0.259755	358.52
444	0.589623	53.475	0.454189	4.15651	0.243548	364.282
445	0.583585	54.6091	0.457543	4.04481	0.24119	369.382
446	0.572325	55.5251	0.453277	3.94963	0.233375	373.737
447	0.572322	56.3937	0.463644	3.8481	0.224283	377.401
448	0.569994	57.1157	0.431032	3.72637	0.220733	380.598
449	0.574503	57.8542	0.405749	3.63411	0.215125	383.205
450	0.552306	58.4252	0.382382	3.53588	0.193961	384.963
451	0.55586	58.8756	0.386777	3.4414	0.184868	385.941
452	0.552252	59.3296	0.381417	3.34945	0.175628	386.609
453	0.557362	59.5429	0.367665	3.26793	0.169605	386.501
454	0.546275	59.7591	0.377349	3.18842	0.152549	385.777
455	0.546045	59.8992	0.379188	3.10328	0.155776	384.565
456	0.530941	59.9316	0.401727	3.03722	0.146049	382.666
457	0.526724	59.8912	0.435623	2.97688	0.139474	379.966
458	0.520188	59.7188	0.465062	2.91314	0.134942	377.052
459	0.519096	59.4955	0.471496	2.84292	0.137661	373.706
460	0.514652	59.2562	0.474239	2.78504	0.133876	369.775
461	0.50838	58.8054	0.471596	2.72413	0.13223	365.455
462	0.497231	58.3101	0.471171	2.66738	0.130116	360.346
463	0.491833	57.7705	0.481869	2.61907	0.13054	354.82
464	0.486376	57.1313	0.488478	2.56554	0.123388	349.06
465	0.487849	56.5164	0.490954	2.51161	0.117163	343.328
466	0.471849	55.8422	0.459892	2.46718	0.115016	337.458
467	0.468534	55.1054	0.485561	2.41094	0.107672	331.449
468	0.468119	54.4028	0.492954	2.35254	0.100325	325.319
469	0.471266	53.6581	0.486351	2.31963	0.087429	319.01
470	0.471489	52.789	0.492824	2.27407	0.076354	312.323
471	0.466992	51.8256	0.48142	2.22226	0.073352	305.606
472	0.470225	50.9009	0.512784	2.16277	0.064077	299.162
473	0.465384	49.9906	0.519949	2.10448	0.047933	292.715
474	0.459801	49.0517	0.53328	2.06213	0.0459	286.153
475	0.457062	48.0903	0.528185	2.01154	0.033662	279.37
476	0.445627	47.0953	0.537094	1.9711	0.030775	272.488
477	0.424552	46.1281	0.545642	1.90663	0.023656	265.757
478	0.424337	45.1705	0.562755	1.86802	0.020445	259.19
479	0.405111	44.2203	0.584747	1.81621	0.015204	252.59
480	0.388439	43.1848	0.581729	1.77545	-0.00013	245.866
481	0.377127	42.2046	0.569281	1.72402	0.006076	239.49
482	0.371693	41.2913	0.5663	1.68933	-0.00659	233.166
483	0.362596	40.2761	0.538274	1.65319	-0.01371	226.89
484	0.36279	39.3001	0.511836	1.61089	-0.02692	220.676
485	0.375138	38.3545	0.523259	1.587	-0.03908	214.593
486	0.359392	37.3582	0.532296	1.54641	-0.04742	208.392
487	0.3488	36.4209	0.517266	1.51377	-0.05322	202.311
488	0.337862	35.5025	0.555047	1.48816	-0.07493	196.203
489	0.347122	34.5875	0.421258	1.46075	-0.08439	190.125
490	0.336824	33.6797	0.424771	1.44712	-0.08845	184.154
491	0.325928	32.8193	0.43876	1.41168	-0.09835	178.453
492	0.300439	32.0265	0.454189	1.38298	-0.12009	173.2
493	0.284626	31.2176	0.457543	1.35809	-0.13997	168.316
494	0.264899	30.4993	0.453277	1.34179	-0.15387	163.756
495	0.265452	29.7877	0.463644	1.33383	-0.19127	159.522
496	0.259297	29.1845	0.431032	1.33517	-0.20976	155.553
497	0.245071	28.527	0.405749	1.32911	-0.22998	151.579
498	0.23923	27.7775	0.382382	1.31693	-0.26565	147.461
499	0.245764	27.0748	0.386777	1.31602	-0.29811	143.192
500	0.248585	26.3486	0.381417	1.32078	-0.3139	138.935
501	0.243579	25.6404	0.367665	1.31893	-0.35	134.769
502	0.238849	24.9073	0.377349	1.31034	-0.36009	130.623
503	0.238233	24.1808	0.379188	1.30912	-0.37623	126.399
504	0.239694	23.4287	0.401727	1.28605	-0.38507	122.289
505	0.237285	22.6419	0.435623	1.27436	-0.39311	118.021
506	0.225298	21.8891	0.465062	1.24519	-0.4001	113.822
507	0.216448	21.1935	0.471496	1.20555	-0.41436	109.753
508	0.202841	20.4756	0.474239	1.1644	-0.41935	105.83
509	0.199114	19.8158	0.471596	1.13479	-0.40653	102.164
510	0.193491	19.2247	0.471171	1.10874	-0.39646	98.6956
511	0.197322	18.6385	0.481869	1.08391	-0.40213	95.4729
512	0.190579	18.1072	0.488478	1.0679	-0.40829	92.4191
513	0.183384	17.6052	0.490954	1.03734	-0.40749	89.5001
514	0.196235	17.158	0.459892	1.03074	-0.40311	86.6629
515	0.208769	16.6639	0.485561	1.02433	-0.38895	83.936
516	0.20857	16.1953	0.492954	1.01825	-0.38814	81.2782
517	0.201099	15.6844	0.486351	1.00441	-0.39135	78.6498
518	0.22315	15.2383	0.492824	1.00206	-0.39668	76.1399
519	0.222747	14.7565	0.48142	0.989022	-0.37992	73.6219
520	0.211756	14.29	0.512784	0.972629	-0.38537	71.0964
521	0.206839	13.8374	0.519949	0.970574	-0.37904	68.6157
522	0.203998	13.4169	0.53328	0.94649	-0.37819	66.1842
523	0.204589	13.006	0.528185	0.919955	-0.37314	63.8211
524	0.209358	12.5897	0.537094	0.905506	-0.38252	61.5966
525	0.216471	12.2407	0.545642	0.88751	-0.3718	59.4922
526	0.22729	11.8617	0.562755	0.866421	-0.36912	57.4041
527	0.204085	11.4989	0.584747	0.8467	-0.36333	55.3978
528	0.216288	11.1653	0.581729	0.836056	-0.36727	53.4945
529	0.219459	10.8398	0.569281	0.827139	-0.36118	51.7241
530	0.206597	10.4808	0.5663	0.81491	-0.3453	50.0215
531	0.200887	10.1499	0.538274	0.808643	-0.33513	48.3278
532	0.196939	9.82354	0.511836	0.806667	-0.32485	46.6692
533	0.185591	9.54425	0.523259	0.789815	-0.32366	45.0635
534	0.162338	9.234	0.532296	0.787768	-0.33515	43.5924
535	0.159842	8.9671	0.517266	0.791604	-0.32945	42.0994
536	0.156292	8.67761	0.555047	0.775577	-0.33224	40.6971
537	0.162833	8.41385	0.421258	0.7609	-0.33237	39.2562
538	0.168841	8.13933	0.424771	0.747973	-0.34281	37.9187
539	0.159001	7.93261	0.43876	0.735124	-0.33837	36.6421
540	0.154795	7.71369	0.454189	0.740256	-0.35535	35.5809
541	-0.01602	7.25153	0.457543	0.611871	-0.42065	34.0749
542	-0.02148	7.02941	0.453277	0.611431	-0.44849	32.9327
543	-0.02787	6.82976	0.463644	0.608928	-0.4409	31.7868
544	-0.03323	6.61725	0.431032	0.609816	-0.45046	30.6093
545	-0.04738	6.42455	0.405749	0.604042	-0.43854	29.5096
546	-0.05388	6.20796	0.382382	0.609275	-0.44061	28.4786
547	-0.05624	6.01079	0.386777	0.600819	-0.44553	27.5069
548	-0.06112	5.81345	0.381417	0.597505	-0.46476	26.5746
549	-0.05804	5.6173	0.367665	0.590379	-0.46657	25.6619
550	-0.06471	5.42112	0.377349	0.584384	-0.46602	24.7362
551	-0.06463	5.24185	0.379188	0.571186	-0.48102	23.8784
552	-0.07647	5.07243	0.401727	0.559905	-0.47734	23.039
553	-0.0669	4.91218	0.435623	0.551973	-0.49251	22.2478
554	-0.07359	4.75551	0.465062	0.533533	-0.5022	21.4903
555	-0.08	4.60671	0.471496	0.515481	-0.5153	20.7718
556	-0.07803	4.48188	0.474239	0.505052	-0.52346	19.9967
557	-0.06863	4.37444	0.471596	0.50147	-0.526	19.2926
558	-0.06431	4.2391	0.471171	0.50302	-0.51793	18.5892
559	-0.05486	4.11125	0.481869	0.49301	-0.51347	17.9496
560	-0.05285	3.99514	0.488478	0.497125	-0.51607	17.2942
561	-0.04521	3.86233	0.490954	0.481912	-0.52702	16.7034
562	-0.03851	3.72744	0.459892	0.485296	-0.51221	16.1161
563	-0.04218	3.60057	0.485561	0.487478	-0.51805	15.5174
564	-0.04806	3.47041	0.492954	0.493731	-0.51277	14.9853
565	-0.05008	3.3495	0.486351	0.489291	-0.51776	14.4707
566	-0.05841	3.25395	0.492824	0.489173	-0.53242	13.9436
567	-0.07417	3.15816	0.48142	0.49617	-0.53415	13.4126
568	-0.06714	3.05602	0.512784	0.502937	-0.54357	12.9266
569	-0.09229	2.94877	0.519949	0.504329	-0.53966	12.47
570	-0.07161	2.85662	0.53328	0.511098	-0.55444	12.0493
571	-0.06869	2.78407	0.528185	0.515701	-0.55038	11.6078
572	-0.07652	2.69445	0.537094	0.516315	-0.56845	11.1809
573	-0.08169	2.62927	0.545642	0.518307	-0.56591	10.7737
574	-0.0876	2.55699	0.562755	0.523286	-0.57156	10.4119
575	-0.07224	2.4623	0.584747	0.518601	-0.58133	10.0671
576	-0.07481	2.37692	0.581729	0.524846	-0.59117	9.71325
577	-0.08325	2.29738	0.569281	0.516655	-0.60512	9.3635
578	-0.08281	2.22647	0.5663	0.526184	-0.61171	9.00092
579	-0.08095	2.14768	0.538274	0.530789	-0.64018	8.67302
580	-0.10166	2.07431	0.511836	0.529645	-0.63403	8.36407
581	-0.09952	2.01516	0.523259	0.521231	-0.63961	8.0373
582	-0.10634	1.94666	0.532296	0.534574	-0.65563	7.74874
583	-0.11104	1.92205	0.517266	0.512211	-0.67131	7.48139
584	-0.13208	1.88015	0.555047	0.519064	-0.66013	7.22488
585	-0.12766	1.81965	0.421258	0.513365	-0.65872	6.98268
586	-0.12624	1.7522	0.424771	0.503801	-0.67151	6.72972
587	-0.13435	1.69406	0.43876	0.484586	-0.66583	6.46449
588	-0.12832	1.63684	0.454189	0.499552	-0.66941	6.22165
589	-0.11631	1.56117	0.457543	0.512516	-0.68019	5.98009
590	-0.0936	1.52399	0.453277	0.504343	-0.6934	5.74777
591	-0.10765	1.44418	0.463644	0.507146	-0.70322	5.53077
592	-0.11474	1.39001	0.431032	0.509097	-0.71447	5.3253
593	-0.11134	1.32434	0.405749	0.511837	-0.72173	5.10499
594	-0.10983	1.29994	0.382382	0.514874	-0.71973	4.91079
595	-0.12154	1.26121	0.386777	0.532542	-0.73178	4.71775
596	-0.11742	1.21316	0.381417	0.521083	-0.73664	4.51701
597	-0.14321	1.18956	0.367665	0.507694	-0.74045	4.3331
598	-0.13769	1.15638	0.377349	0.493081	-0.73807	4.16211
599	-0.13341	1.11099	0.379188	0.500914	-0.74206	3.97806
600	-0.12562	1.08534	0.401727	0.487985	-0.7661	3.80314
601	-0.12687	1.0576	0.435623	0.499384	-0.76794	3.64742
602	-0.14542	1.01423	0.465062	0.503348	-0.78674	3.47528
603	-0.15274	0.974487	0.471496	0.49028	-0.79659	3.34823
604	-0.15793	0.939253	0.474239	0.487293	-0.8164	3.20557
605	-0.15634	0.898804	0.471596	0.520059	-0.83125	3.07843
606	-0.16302	0.880388	0.471171	0.526709	-0.85819	2.92826
607	-0.18017	0.862443	0.481869	0.528549	-0.8711	2.8066
608	-0.17657	0.816312	0.488478	0.552656	-0.86585	2.67719
609	-0.17997	0.79336	0.490954	0.548845	-0.89418	2.54236
610	-0.15478	0.767216	0.459892	0.556609	-0.91938	2.43871
611	-0.13967	0.754147	0.485561	0.576441	-0.92995	2.3065
612	-0.16892	0.754203	0.492954	0.585898	-0.93001	2.21612
613	-0.17514	0.722111	0.486351	0.563618	-0.92062	2.09676
614	-0.17847	0.672763	0.492824	0.564245	-0.92749	1.97351
615	-0.16347	0.638174	0.48142	0.557763	-0.92557	1.89553
616	-0.18091	0.622307	0.512784	0.548976	-0.94667	1.8011
617	-0.19437	0.60096	0.519949	0.53916	-0.95981	1.71101
618	-0.21506	0.571412	0.53328	0.535467	-0.95309	1.58062
619	-0.2356	0.550431	0.528185	0.514491	-0.97091	1.48847
620	-0.2466	0.506781	0.537094	0.524316	-0.98336	1.38379
621	-0.23445	0.49612	0.545642	0.549235	-1.01372	1.31485
622	-0.23123	0.492533	0.562755	0.547679	-1.01361	1.26438
623	-0.23423	0.481869	0.584747	0.564561	-1.02544	1.15647
624	-0.25302	0.46373	0.581729	0.567231	-1.01296	1.05351
625	-0.2383	0.456951	0.569281	0.589344	-0.9998	1.00157
626	-0.24005	0.453656	0.5663	0.59246	-0.9988	0.951007
627	-0.24604	0.433737	0.538274	0.604958	-1.01618	0.882253
628	-0.22934	0.430289	0.511836	0.584551	-1.02043	0.815504
629	-0.23678	0.404745	0.523259	0.576099	-1.01497	0.725307
630	-0.26333	0.384468	0.532296	0.592376	-1.03096	0.652162
631	-0.29437	0.376902	0.517266	0.608247	-1.05635	0.577018
632	-0.26373	0.368951	0.555047	0.643113	-1.08105	0.533369
633	-0.28023	0.348462	0.401727	0.621754	-1.0749	0.489969
634	-0.28995	0.3161	0.435623	0.623388	-1.09989	0.427925
635	-0.28214	0.284812	0.465062	0.636518	-1.08764	0.357458
636	-0.27492	0.284908	0.471496	0.654466	-1.09719	0.320629
637	-0.28002	0.28073	0.474239	0.644265	-1.10937	0.253771
638	-0.26412	0.258831	0.471596	0.669429	-1.10061	0.231407
639	-0.28124	0.231339	0.471171	0.661082	-1.1268	0.199441
640	-0.27429	0.233199	0.481869	0.656637	-1.13897	0.110031
641	-0.28521	0.227052	0.488478	0.657432	-1.17093	0.02288
642	-0.2553	0.22372	0.490954	0.669289	-1.17816	-0.02537
643	-0.27943	0.21436	0.459892	0.663857	-1.21813	-0.048
644	-0.28978	0.197906	0.485561	0.66446	-1.26178	-0.13348
645	-0.30096	0.188548	0.492954	0.666777	-1.2818	-0.14862
646	-0.31647	0.189944	0.486351	0.633098	-1.31193	-0.19046
647	-0.31835	0.165691	0.492824	0.643711	-1.32146	-0.22855
648	-0.29998	0.126084	0.48142	0.632882	-1.35205	-0.26343
649	-0.31365	0.110048	0.512784	0.620736	-1.34889	-0.30604
650	-0.3234	0.112562	0.519949	0.627344	-1.35841	-0.35572
651	-0.33911	0.107726	0.53328	0.652933	-1.36981	-0.41112
652	-0.3052	0.078558	0.528185	0.667217	-1.35148	-0.42836
653	-0.2943	0.09584	0.537094	0.690482	-1.37322	-0.48789
654	-0.30174	0.145089	0.545642	0.676591	-1.38527	-0.53884
655	-0.30935	0.15271	0.562755	0.716443	-1.40035	-0.57825
656	-0.31185	0.151103	0.584747	0.720118	-1.42137	-0.62522
657	-0.29601	0.176588	0.581729	0.737897	-1.46423	-0.65763
658	-0.31421	0.173678	0.569281	0.725958	-1.48574	-0.67316
659	-0.28408	0.138524	0.5663	0.727439	-1.49406	-0.69658
660	-0.33518	0.116763	0.538274	0.718983	-1.52157	-0.74881
661	-0.32339	0.103015	0.511836	0.724227	-1.56699	-0.76928
662	-0.34684	0.074325	0.523259	0.748053	-1.57141	-0.80917
663	-0.36016	0.082783	0.532296	0.731071	-1.55602	-0.86854
664	-0.376	0.06764	0.517266	0.737831	-1.59999	-0.89849
665	-0.40467	0.072875	0.555047	0.760021	-1.58144	-0.90102
666	-0.37231	0.120523	0.545186	0.77152	-1.58759	-0.95661
667	-0.3915	0.145466	0.570321	0.747215	-1.62395	-0.94434
668	-0.40154	0.130477	0.618134	0.749721	-1.63466	-1.00878
669	-0.38194	0.121667	0.616728	0.765212	-1.65524	-1.0605
670	-0.3611	0.103936	0.622687	0.786121	-1.65507	-1.06984
671	-0.32424	0.099886	0.663414	0.795612	-1.64478	-1.08815
672	-0.32748	0.062753	0.679856	0.786496	-1.67319	-1.16723
673	-0.29493	-0.00209	0.699974	0.771927	-1.66303	-1.22604
674	-0.31057	0.00035	0.758094	0.758859	-1.70381	-1.25465
675	-0.33092	-0.0058	0.738279	0.788854	-1.70609	-1.28792
676	-0.31226	0.032698	0.729446	0.803549	-1.74995	-1.29505
677	-0.3541	-0.00463	0.763587	0.832694	-1.7757	-1.30884
678	-0.36629	-0.00957	0.748451	0.80517	-1.84432	-1.34564
679	-0.36604	-0.03033	0.730359	0.818138	-1.85547	-1.34346
680	-0.37777	-0.01834	0.690613	0.862379	-1.89746	-1.33806
681	-0.38907	-0.00239	0.678491	0.880669	-1.91757	-1.36615
682	-0.41522	-0.00771	0.679741	0.866974	-1.89469	-1.38199
683	-0.39171	-0.02213	0.691872	0.847293	-1.92031	-1.43397
684	-0.40672	0.011173	0.70578	0.847189	-1.93316	-1.44469
685	-0.39039	-0.00057	0.697886	0.84773	-1.96977	-1.47015
686	-0.40537	-0.01254	0.739788	0.887996	-1.94476	-1.51323
687	-0.4165	0.005828	0.770655	0.931735	-1.98065	-1.55842
688	-0.4188	-0.0091	0.806409	0.911723	-2.01734	-1.57632
689	-0.4348	-0.04001	0.790924	0.937205	-2.04326	-1.59936
690	-0.40132	-0.05325	0.756711	0.997005	-2.05487	-1.63853
691	-0.43972	-0.08891	0.733048	1.03312	-2.09472	-1.71272
692	-0.48005	-0.08516	0.735688	1.06994	-2.12455	-1.74319
693	-0.53466	-0.05839	0.734248	1.08473	-2.18269	-1.75836
694	-0.51145	-0.07589	0.713431	1.09006	-2.22834	-1.80875
695	-0.54875	-0.10255	0.692717	1.11129	-2.21701	-1.86772
696	-0.55905	-0.05658	0.674596	1.12104	-2.25	-1.88774
697	-0.58709	-0.02851	0.724802	1.15854	-2.30043	-1.90143
698	-0.63444	-0.04139	0.75279	1.17064	-2.32359	-1.95671
699	-0.61757	-0.03709	0.744972	1.23626	-2.34359	-1.98998
700	-0.64135	0.002526	0.723697	1.26812	-2.33112	-2.05671
701	-0.57506	-0.00402	0.723562	1.25215	-2.34011	-2.06548
702	-0.54102	0.012397	0.775962	1.34717	-2.36894	-2.1363
703	-0.52647	0.024796	0.813734	1.39553	-2.35476	-2.24776
704	-0.52307	-0.01546	0.830621	1.42373	-2.38344	-2.36315
705	-0.45253	0.012002	0.861212	1.45189	-2.42046	-2.38184
706	-0.5043	0.002903	0.875537	1.46997	-2.40798	-2.33188
707	-0.48884	-0.04323	0.841921	1.44736	-2.44359	-2.36289
708	-0.52372	-0.06892	0.862391	1.43777	-2.4659	-2.38713
709	-0.60572	-0.07864	0.822844	1.43346	-2.4887	-2.40649
710	-0.64351	-0.11967	0.75806	1.36539	-2.55144	-2.38526
711	-0.67797	-0.19196	0.792616	1.3988	-2.54238	-2.35995
712	-0.7382	-0.19534	0.824553	1.45035	-2.57696	-2.4301
713	-0.7486	-0.18188	0.87398	1.36799	-2.61562	-2.47708
714	-0.75508	-0.17353	0.949537	1.42525	-2.69274	-2.46717
715	-0.73679	-0.1822	0.999526	1.45932	-2.73587	-2.50123
716	-0.66274	-0.21445	1.01403	1.46765	-2.80959	-2.56364
717	-0.63045	-0.1429	1.10877	1.42985	-2.80419	-2.60449
718	-0.56722	-0.07297	1.19476	1.51552	-2.83073	-2.65664
719	-0.47289	0.019104	1.22557	1.52684	-2.87816	-2.69751
720	-0.41929	0.07656	1.34485	1.58311	-2.92909	-2.69862
721	-0.27623	0.197703	1.41035	1.69845	-2.94064	-2.71993
722	-0.23499	0.337366	1.58657	1.82364	-2.97673	-2.81855
723	-0.04937	0.528586	1.8375	2.00151	-3.0388	-2.87926
724	0.12271	0.681087	2.1275	2.17527	-3.08049	-2.84535
725	0.385744	0.846734	2.405	2.40381	-3.10915	-2.87409
726	0.604487	1.07699	2.59858	2.67764	-3.1685	-2.91724
727	0.790447	1.29325	2.80832	2.93476	-3.20453	-2.9914
728	1.01665	1.479	2.94539	3.13007	-3.2824	-3.08704
729	1.16986	1.65816	3.03372	3.27988	-3.31491	-3.12738
730	1.32015	1.73945	3.14229	3.43463	-3.37916	-3.20974
731	1.19045	1.81847	3.07763	3.47064	-3.33999	-3.30598
732	1.09419	1.7973	2.98177	3.48665	-3.34063	-3.35959
733	0.910784	1.65368	2.88551	3.36019	-3.34169	-3.37759
734	0.703903	1.55358	2.75993	3.12233	-3.30426	-3.35274
735	0.449603	1.27975	2.61389	2.90138	-3.18142	-3.39033
736	0.21123	0.97636	2.44374	2.68712	-3.09062	-3.30075
737	-0.03036	0.860199	2.16878	2.47547	-2.89894	-3.24145
738	-0.20739	0.644166	1.90895	2.34761	-2.71303	-3.12182
739	-0.37363	0.533985	1.78057	2.20853	-2.50973	-3.11418
740	-0.50326	0.44544	1.67149	2.08028	-2.22477	-3.05816
741	-0.58995	0.265366	1.55761	2.01562	-1.99272	-3.06911
742	-0.65694	0.228332	1.4506	2.04102	-1.79091	-3.09295
743	-0.74845	0.251601	1.43731	1.9377	-1.56948	-3.08521
744	-0.88934	0.169872	1.44906	1.9886	-1.51675	-3.05699
745	-0.91347	0.197805	1.47479	1.98585	-1.51064	-3.15107
746	-0.96829	0.017244	1.48567	1.95275	-1.63352	-3.18486
747	-1.10225	-0.0269	1.45482	1.98112	-1.8443	-3.31905
748	-1.10137	-0.00739	1.49957	1.9426	-2.11273	-3.29997
749	-1.11174	-0.05505	1.54781	1.97933	-2.48156	-3.41993
750	-1.13944	-0.03878	1.60291	1.94046	-2.82959	-3.5548
751	3.07911	3.09202	2.82294	5.28475	2.76553	4.38025
752	3.08755	3.0264	2.88683	5.24255	2.79372	4.3536
753	3.12691	3.0516	2.99455	5.15243	2.83002	4.32186
754	2.99556	3.14226	2.98496	5.13925	2.81717	4.30314
755	3.00542	3.17424	3.11355	5.2085	2.78854	4.32787
756	3.11908	3.206	3.18089	5.1586	2.73297	4.28205
757	3.05515	3.3577	3.25046	5.15981	2.73691	4.29711
758	3.10978	3.44867	3.34191	5.28031	2.65898	4.34616
759	3.01082	3.42051	3.4865	5.23817	2.57869	4.39544
760	3.02368	3.52752	3.44417	5.40133	2.6013	4.48032
761	3.10463	3.5363	3.54463	5.4291	2.4888	4.59313
762	3.20913	3.48868	3.64257	5.44018	2.57221	4.55809
763	3.18227	3.56867	3.61173	5.53941	2.63309	4.67257
764	3.19851	3.61831	3.6948	5.4601	2.70577	4.71992
765	3.14977	3.64336	3.886	5.52249	2.7957	4.62801
766	3.26267	3.90816	3.86807	5.58958	2.84002	4.62067
767	3.26232	3.91792	3.86981	5.43259	2.92255	4.54568
768	3.37436	4.13793	4.06387	5.46923	3.09878	4.60436
769	3.34057	4.11837	4.09125	5.44182	3.1034	4.64384
770	3.37048	4.25975	4.3592	5.41752	3.10923	4.59157
771	3.51553	4.24389	4.38026	5.37432	3.18418	4.63527
772	3.5361	4.14043	4.27755	5.39347	3.27108	4.76069
773	3.71971	4.15271	4.31321	5.40923	3.40523	4.8541
774	3.7945	4.22286	4.49425	5.33405	3.57619	4.8062
775	3.79638	4.07767	4.2967	5.15734	3.62564	4.7749
776	3.86753	4.12512	4.3252	5.12238	3.83791	4.72611
777	4.03191	4.23954	4.27095	5.03556	3.83403	4.82473
778	3.90682	4.24894	4.35765	5.12541	3.89128	4.92324
779	4.03767	4.28546	4.34614	5.08017	3.91583	4.89214
780	4.13783	4.36223	4.26357	5.2029	3.88422	4.84294
781	4.28117	4.35849	4.53358	5.36772	3.74544	5.03334
782	4.29518	4.40216	4.63685	5.54041	3.9602	5.03701
783	4.4554	4.5305	4.74428	5.51394	3.89383	5.01459
784	4.49545	4.45369	4.75542	5.7272	4.01467	4.95078
785	4.71272	4.41737	4.85365	5.74887	3.99493	4.79648
786	4.77289	4.57756	4.95661	5.7651	4.07019	4.74484
787	4.86074	4.64286	5.07186	5.68582	4.21085	4.9714
788	4.75111	4.79879	4.83066	5.62243	4.41506	5.0403
789	4.79937	5.04244	4.8522	5.61714	4.20857	5.26454
790	4.74925	5.14719	4.85456	5.6668	4.15422	5.42499
791	4.56757	5.14908	4.81896	5.68815	4.03391	5.38727
792	4.57974	5.22196	4.80272	5.71712	4.15316	5.26322
793	4.50983	5.2573	4.89135	5.66003	4.27545	5.42438
794	4.44836	5.25613	5.07293	5.75908	4.38955	5.40281
795	4.61987	5.24412	5.13292	5.85839	4.50585	5.39744
796	4.59073	5.13285	5.18825	6.10217	4.71002	5.21122
797	4.72677	5.00187	5.31412	6.20485	5.02375	5.22289
798	4.97013	5.01958	5.36895	6.25215	5.27642	5.45265
799	5.16789	5.19555	5.53656	6.40812	5.31121	5.75085
800	5.35947	5.23381	5.63106	6.53519	5.47836	5.75801
