# Supplementary material for: Genetic encoding of a highly photostable, long lifetime fluorescent amino acid for imaging in mammalian cells
Source: Chem Sci. 2021 Aug 3;12(36):11955–64. doi: 10.1039/d1sc01914g (PMC8634729; doi:10.1039/d1sc01914g)
Supplement: SC-012-D1SC01914G-s015 [file SC-012-D1SC01914G-s015.xlsx]

## Sheet: Sheet1
Wavelength	H2O_Incident	H2O_Sample	DMSO_Incident	DMSO_Sample	MeOH_Incident	MeOH_Sample	THF_Incident	THF_Sample
350	4.93283	4.01049	4.69014	2.76312	4.92264	3.07963	4.88215	3.00136
351	19.099	15.4214	18.1171	10.2049	19.1694	11.5995	19.0012	11.5562
352	66.2199	53.4583	62.8451	35.1599	66.5529	39.9465	66.0887	40.1188
353	183.344	148.047	174.262	97.3875	184.234	110.527	182.422	111.482
354	418.087	338.32	397.847	222.466	419.333	252.064	415.561	255.149
355	815.496	662.688	778.312	437.15	819.145	493.875	812.858	502.785
356	1392.81	1137.8	1331.81	752.674	1403.21	850.414	1392.89	867.205
357	2121.54	1741.5	2031.54	1154.79	2143.38	1305	2128.24	1331.47
358	2924.47	2407.36	2804.46	1599.99	2955.83	1807.76	2937.07	1847.05
359	3732.2	3075.1	3580.06	2046.57	3765.57	2310.38	3741.08	2365.58
360	4447.64	3669.59	4267.62	2445.55	4483.04	2757.74	4450.51	2829.94
361	5087.03	4204.78	4875.03	2801.06	5113.63	3157.19	5075.21	3242.06
362	5126.54	4244.61	4918.31	2831.75	5154.26	3190.87	5119.14	3276.89
363	5059.59	4195.2	4857.41	2802.07	5086.61	3157.71	5056.01	3243.52
364	4733.91	3932.23	4544.72	2627.4	4753.98	2961.58	4731.16	3043.57
365	4173.44	3474.88	4008.05	2323.59	4184.55	2617.96	4169.89	2691.51
366	3446.35	2876.8	3312.38	1925.1	3449.52	2167.52	3441.27	2230.26
367	2637.22	2205.4	2537.69	1477.94	2636.37	1663.74	2630.77	1713.35
368	1845.44	1544.61	1777.08	1038.3	1845.49	1168.48	1839.46	1205.97
369	1165.63	978.75	1122.6	660.779	1167.99	740.938	1162.8	768.46
370	653.759	550.403	629.702	373.061	654.823	417.15	651.173	434.779
371	317.633	266.914	306.385	182.577	317.809	203.454	315.646	212.774
372	127.36	106.546	123.11	73.7199	127.991	82.1682	126.302	86.1038
373	40.2964	33.7829	38.9263	23.5308	40.5261	26.2282	39.9074	27.5874
374	10.1385	8.6567	9.96622	6.16866	10.2351	6.77423	10.1433	7.10033
375	2.71619	2.33672	2.76611	1.80896	2.74782	1.89699	2.72877	1.99511
376	1.57632	1.39977	1.66193	1.12612	1.6118	1.15796	1.62014	1.21438
377	1.29539	1.15113	1.38106	0.95886	1.31865	0.96924	1.34404	1.00855
378	1.11389	0.991049	1.20035	0.842705	1.13753	0.854326	1.16615	0.873361
379	0.954623	0.852934	1.04751	0.736735	0.969414	0.739097	0.999893	0.763782
380	0.81875	0.73873	0.912857	0.649051	0.819082	0.650046	0.8646	0.662211
381	0.712729	0.645309	0.809438	0.57775	0.721828	0.587703	0.757204	0.580875
382	0.637698	0.579694	0.741811	0.52962	0.633158	0.539084	0.673368	0.526484
383	0.587321	0.542735	0.697454	0.485818	0.58426	0.507847	0.612245	0.485431
384	0.554762	0.513626	0.665782	0.4637	0.556445	0.491608	0.583853	0.456063
385	0.539509	0.490067	0.658328	0.457131	0.535104	0.46888	0.553567	0.440755
386	0.537855	0.485217	0.651718	0.458702	0.527127	0.458939	0.53307	0.442886
387	0.529509	0.485376	0.65087	0.45324	0.523797	0.445507	0.523917	0.442959
388	0.534309	0.492948	0.64698	0.459728	0.524549	0.43847	0.525068	0.444841
389	0.534059	0.494551	0.653129	0.466974	0.52718	0.437222	0.513956	0.45123
390	0.540974	0.499313	0.661774	0.468768	0.530289	0.430418	0.519872	0.45617
391	0.536268	0.50172	0.663096	0.474416	0.533139	0.420133	0.5233	0.451765
392	0.544629	0.504448	0.664114	0.48892	0.534192	0.415682	0.521904	0.456015
393	0.549712	0.50139	0.668581	0.486298	0.54271	0.412198	0.532235	0.46583
394	0.556714	0.512397	0.682854	0.48624	0.55106	0.41696	0.55136	0.469751
395	0.566803	0.520093	0.697573	0.488891	0.559318	0.422684	0.558074	0.485062
396	0.582388	0.536663	0.713601	0.504314	0.56989	0.440028	0.586559	0.499694
397	0.590731	0.551578	0.737906	0.515766	0.587848	0.459183	0.610257	0.515148
398	0.607068	0.563796	0.772679	0.532942	0.611573	0.476488	0.631386	0.541275
399	0.626756	0.571315	0.807109	0.559625	0.630287	0.503148	0.659997	0.570894
400	0.644412	0.586333	0.855878	0.58026	0.660236	0.525227	0.697071	0.608788
401	0.660692	0.61428	0.907929	0.608285	0.696146	0.544651	0.742267	0.648722
402	0.686138	0.636874	0.957476	0.64857	0.738706	0.570763	0.781298	0.686083
403	0.710076	0.659278	1.00845	0.686909	0.775569	0.594122	0.821928	0.731479
404	0.734511	0.677789	1.06248	0.722316	0.805799	0.614743	0.860376	0.787371
405	0.754244	0.687676	1.10422	0.752275	0.842288	0.629089	0.890433	0.833629
406	0.778624	0.711486	1.14081	0.77352	0.858871	0.649873	0.918693	0.87771
407	0.808423	0.745246	1.15547	0.794142	0.887197	0.669253	0.937873	0.922102
408	0.82953	0.7829	1.1659	0.809428	0.906053	0.678392	0.947909	0.970373
409	0.867917	0.810704	1.16698	0.824992	0.918506	0.698053	0.948608	1.01743
410	0.900078	0.82899	1.16568	0.839531	0.93103	0.715549	0.946338	1.07148
411	0.918485	0.848286	1.18345	0.853681	0.938117	0.721475	0.934143	1.13527
412	0.942597	0.873686	1.1766	0.859511	0.943501	0.719939	0.92628	1.19158
413	0.96022	0.892722	1.17243	0.859443	0.956581	0.72067	0.914958	1.26641
414	0.97386	0.908114	1.16393	0.85756	0.969383	0.728335	0.907872	1.35889
415	0.980768	0.917939	1.16292	0.8689	0.975793	0.736172	0.89407	1.4489
416	0.976076	0.916318	1.15744	0.87322	0.969259	0.740696	0.895832	1.56001
417	0.977108	0.9132	1.15762	0.887948	0.959729	0.754103	0.890779	1.70436
418	0.964093	0.908549	1.15868	0.90383	0.960519	0.757141	0.894495	1.86206
419	0.960275	0.910326	1.15169	0.914232	0.951601	0.760393	0.882842	2.03494
420	0.943889	0.915791	1.14014	0.912763	0.950787	0.779855	0.885217	2.23322
421	0.937761	0.902682	1.14275	0.933244	0.944843	0.791732	0.885344	2.45922
422	0.936346	0.890887	1.1324	0.948302	0.944086	0.804984	0.886608	2.7018
423	0.939512	0.888635	1.13163	0.974748	0.932493	0.819289	0.894441	2.97129
424	0.932121	0.885185	1.1303	0.997794	0.936402	0.829197	0.899588	3.29484
425	0.942019	0.869988	1.13588	1.03638	0.947838	0.848215	0.889575	3.62686
426	0.939066	0.876494	1.13269	1.06286	0.95243	0.867785	0.89277	3.98575
427	0.941052	0.871341	1.14324	1.09452	0.970418	0.886094	0.898677	4.37279
428	0.943513	0.873615	1.15703	1.13634	0.980368	0.914088	0.911033	4.78629
429	0.940562	0.870234	1.16425	1.18739	0.981769	0.941991	0.915996	5.23326
430	0.946006	0.874687	1.15792	1.23995	0.989942	0.990434	0.92167	5.74144
431	0.951835	0.887255	1.16794	1.30103	0.991465	1.03248	0.930745	6.28075
432	0.956813	0.884862	1.16715	1.36427	0.988003	1.07416	0.934711	6.86105
433	0.951007	0.894941	1.18157	1.41799	0.996156	1.12756	0.946845	7.51567
434	0.951542	0.897965	1.19539	1.48579	0.999192	1.17737	0.955582	8.22038
435	0.965876	0.905057	1.20774	1.56338	0.99014	1.23828	0.954927	8.96385
436	0.95931	0.909069	1.20718	1.65395	0.977071	1.30544	0.950378	9.76151
437	0.965008	0.900836	1.21608	1.76442	0.973888	1.38491	0.948389	10.6277
438	0.967136	0.907463	1.21772	1.87826	0.979656	1.46021	0.939471	11.5292
439	0.967046	0.905546	1.22319	1.99709	0.978652	1.54987	0.933432	12.4902
440	0.957874	0.895218	1.23312	2.12197	0.971896	1.64911	0.926086	13.528
441	0.954994	0.896603	1.22896	2.27852	0.964128	1.76497	0.907905	14.5902
442	0.959673	0.889149	1.21109	2.46291	0.945889	1.86925	0.897913	15.7229
443	0.948044	0.88143	1.20336	2.64016	0.939399	2.00007	0.888354	16.9281
444	0.93784	0.887209	1.19007	2.85596	0.923446	2.13061	0.879579	18.1578
445	0.932618	0.889964	1.17128	3.08232	0.921922	2.26953	0.869925	19.4419
446	0.930694	0.884238	1.15246	3.32449	0.901413	2.42514	0.864605	20.7907
447	0.925672	0.880944	1.14242	3.59391	0.891459	2.58885	0.866566	22.2149
448	0.922433	0.873575	1.13707	3.90417	0.889252	2.77186	0.859694	23.7251
449	0.913171	0.873639	1.12746	4.24033	0.892516	2.97335	0.860256	25.2602
450	0.904493	0.876881	1.12394	4.58484	0.90206	3.17984	0.864872	26.8218
451	0.898889	0.874338	1.11118	4.98086	0.897361	3.40947	0.867822	28.4189
452	0.882676	0.875394	1.11499	5.39661	0.895427	3.64658	0.869059	30.1029
453	0.887317	0.864843	1.1041	5.86073	0.887764	3.93965	0.868223	31.8284
454	0.87912	0.863958	1.10055	6.3634	0.894841	4.2193	0.880007	33.6529
455	0.869826	0.8676	1.10102	6.87742	0.887724	4.53624	0.873427	35.4879
456	0.857178	0.864691	1.09359	7.44869	0.882771	4.85902	0.872845	37.3805
457	0.841585	0.864068	1.09083	8.05389	0.87288	5.21717	0.870171	39.2727
458	0.843461	0.854962	1.08575	8.73226	0.865885	5.59925	0.863059	41.2058
459	0.846501	0.855322	1.07099	9.42927	0.857767	5.99564	0.863892	43.1604
460	0.843543	0.854304	1.06645	10.1699	0.859707	6.42887	0.856942	45.1741
461	0.854228	0.847165	1.06353	10.9673	0.853743	6.89756	0.849337	47.1183
462	0.841066	0.858406	1.06627	11.8154	0.855525	7.36604	0.841132	49.1112
463	0.845057	0.862279	1.06555	12.6881	0.85084	7.86018	0.825957	51.034
464	0.849229	0.846434	1.05525	13.6088	0.846149	8.3972	0.821279	53.015
465	0.849669	0.855674	1.04824	14.6105	0.847511	8.95901	0.815144	54.9851
466	0.852504	0.862934	1.04613	15.6785	0.839102	9.55265	0.821202	56.9985
467	0.848233	0.871078	1.03407	16.7813	0.835636	10.1411	0.811581	59.027
468	0.841716	0.875048	1.03418	17.9665	0.836424	10.7897	0.806395	61.0359
469	0.83806	0.889176	1.03125	19.1397	0.827955	11.4338	0.802993	63.0078
470	0.841934	0.892005	1.02876	20.4227	0.834373	12.0875	0.805112	64.9119
471	0.84456	0.892995	1.02786	21.7343	0.831509	12.7733	0.812155	66.7604
472	0.832216	0.900977	1.02917	23.1205	0.814989	13.4982	0.806846	68.549
473	0.826209	0.904122	1.03706	24.5567	0.809968	14.2404	0.811143	70.3478
474	0.813441	0.906112	1.02233	26.0312	0.795629	15.0003	0.803161	72.1543
475	0.818015	0.908763	1.00873	27.4994	0.790572	15.7715	0.804428	73.8157
476	0.802759	0.906088	1.01219	29.0337	0.774868	16.5369	0.795014	75.4877
477	0.805721	0.922657	1.01454	30.6369	0.75974	17.3765	0.794222	77.1677
478	0.795836	0.933058	0.990903	32.2651	0.760277	18.2406	0.782879	78.8126
479	0.781701	0.940421	0.983716	33.9466	0.753104	19.0625	0.76754	80.315
480	0.772229	0.950053	0.972049	35.6568	0.745045	19.8976	0.770949	81.8152
481	0.762059	0.964401	0.958743	37.4024	0.745133	20.7918	0.763048	83.2824
482	0.770301	0.986592	0.952705	39.1561	0.749256	21.7055	0.762293	84.6571
483	0.752395	0.998378	0.942747	41.028	0.754984	22.6315	0.756598	85.8486
484	0.758982	1.0233	0.947846	42.8443	0.765702	23.5575	0.754707	87.0049
485	0.746323	1.03858	0.950959	44.745	0.760443	24.487	0.752339	87.998
486	0.748242	1.04591	0.94883	46.5612	0.75304	25.3966	0.743217	88.9737
487	0.753875	1.06352	0.954505	48.3591	0.739643	26.3102	0.729329	89.8559
488	0.749505	1.07844	0.956748	50.1232	0.733657	27.2454	0.736079	90.6327
489	0.759485	1.10415	0.959911	51.8733	0.72888	28.1128	0.731874	91.2229
490	0.761089	1.12332	0.962225	53.6497	0.734237	28.9851	0.728866	91.681
491	0.771416	1.14539	0.958732	55.3647	0.730355	29.844	0.722275	92.2244
492	0.771895	1.1616	0.954905	57.1016	0.739497	30.7175	0.719623	92.7961
493	0.770421	1.18314	0.959615	59.015	0.749703	31.6644	0.716031	93.5047
494	0.781422	1.21616	0.964746	61.0574	0.759831	32.6381	0.724416	94.2964
495	0.796626	1.27922	0.986376	63.2409	0.777595	33.6748	0.744109	95.156
496	0.8073	1.34104	1.01079	65.5756	0.796159	34.7366	0.76867	96.0406
497	0.844216	1.38976	1.01887	67.922	0.805856	35.9007	0.788624	96.9094
498	0.853026	1.45138	1.03519	70.1829	0.818635	37.0275	0.799198	97.56
499	0.862967	1.50115	1.05189	72.3882	0.812724	38.0731	0.81492	98.1176
500	0.86685	1.55977	1.07257	74.6813	0.818824	39.1601	0.824102	98.545
501	0.901013	1.61855	1.0892	76.8773	0.82027	40.2927	0.858428	98.8442
502	0.896725	1.67552	1.09705	78.9671	0.835187	41.3213	0.872132	99.0553
503	0.888478	1.71602	1.08712	81.0638	0.825532	42.3861	0.882578	99.0634
504	0.877662	1.76083	1.08176	82.8955	0.817607	43.3533	0.894167	98.9558
505	0.87388	1.7818	1.07543	84.6064	0.827996	44.2139	0.886137	98.6291
506	0.855788	1.81965	1.05135	86.2508	0.810017	45.0292	0.885879	98.1839
507	0.847572	1.85572	1.04872	87.7556	0.804608	45.8086	0.889558	97.7716
508	0.854592	1.90154	1.03194	89.3073	0.7976	46.5073	0.872636	97.3066
509	0.81766	1.93785	1.02596	90.8102	0.79685	47.1788	0.861127	96.8377
510	0.812977	1.98055	1.01662	92.2634	0.791604	47.8815	0.85033	96.3433
511	0.811569	2.04117	1.00721	93.7357	0.78393	48.6323	0.841994	95.9234
512	0.805055	2.07534	0.998575	95.1384	0.786222	49.3673	0.8209	95.5136
513	0.805846	2.11103	1.00861	96.611	0.769607	50.0477	0.817654	95.1409
514	0.787554	2.16254	0.995041	98.0144	0.763587	50.8077	0.797357	94.8539
515	0.783514	2.21018	0.996125	99.4747	0.76961	51.3943	0.788481	94.3802
516	0.780034	2.26448	0.998388	100.838	0.773258	52.0237	0.794912	93.8865
517	0.777145	2.29508	0.980935	102.134	0.75679	52.6516	0.789603	93.3147
518	0.779748	2.35122	0.963636	103.34	0.76105	53.305	0.78088	92.639
519	0.783255	2.38375	0.948379	104.585	0.743901	53.8685	0.763512	91.9193
520	0.769701	2.42254	0.93919	105.687	0.736749	54.3463	0.764373	91.2562
521	0.76609	2.47091	0.92225	106.693	0.728683	54.7591	0.750141	90.3285
522	0.752084	2.53353	0.900323	107.616	0.738463	55.2049	0.727624	89.4385
523	0.746854	2.57374	0.899309	108.42	0.727351	55.642	0.725999	88.505
524	0.749609	2.63282	0.88743	109.011	0.718435	55.9571	0.708277	87.5401
525	0.73283	2.67428	0.893897	109.664	0.713963	56.3846	0.718449	86.6131
526	0.725626	2.70374	0.89462	110.326	0.698659	56.6937	0.715476	85.8215
527	0.717289	2.75112	0.900473	110.867	0.708598	56.9511	0.708742	84.946
528	0.709236	2.8169	0.883065	111.236	0.711947	57.0875	0.7045	83.8638
529	0.699887	2.87971	0.882903	111.625	0.707752	57.3488	0.70696	82.9159
530	0.688454	2.92814	0.878705	112.033	0.698701	57.5642	0.708887	81.9224
531	0.692916	2.95591	0.857852	112.473	0.69896	57.7496	0.720555	80.9439
532	0.680924	3.01403	0.84262	112.847	0.689645	57.9822	0.707627	79.9646
533	0.686203	3.02993	0.839608	113.186	0.688223	58.1636	0.714458	79.0298
534	0.674132	3.08331	0.82637	113.42	0.686123	58.2983	0.70191	77.9502
535	0.672502	3.14148	0.812994	113.608	0.683177	58.4175	0.699474	76.8571
536	0.670059	3.16011	0.804311	113.731	0.67027	58.4672	0.694829	75.8482
537	0.666899	3.2042	0.804194	113.847	0.662276	58.5578	0.698483	74.7079
538	0.646182	3.25227	0.809179	113.774	0.654396	58.5451	0.685536	73.6366
539	0.635481	3.29706	0.799493	113.809	0.644279	58.6375	0.665888	72.6066
540	0.648071	3.36793	0.811262	113.858	0.638154	58.7406	0.657927	71.7764
541	0.521165	3.34322	0.713771	113.188	0.536465	58.3794	0.536608	70.4243
542	0.524948	3.41212	0.72034	113.061	0.54088	58.392	0.537513	69.4178
543	0.528864	3.44547	0.720134	112.741	0.535644	58.2961	0.543558	68.3518
544	0.53392	3.48595	0.723119	112.463	0.534034	58.1503	0.552387	67.315
545	0.541659	3.53744	0.724155	112.037	0.540517	57.9435	0.553033	66.3687
546	0.550153	3.61042	0.717841	111.562	0.536252	57.7559	0.566654	65.305
547	0.537344	3.63907	0.706213	111.142	0.546669	57.5993	0.571983	64.1867
548	0.536066	3.68722	0.694381	110.658	0.543964	57.3338	0.560864	63.1092
549	0.537769	3.75416	0.689229	110.054	0.519855	57.1122	0.571018	62.0428
550	0.536404	3.77364	0.681621	109.463	0.503208	56.8542	0.567223	61.0166
551	0.542086	3.79554	0.671647	108.881	0.492045	56.5368	0.573428	60.053
552	0.536824	3.83752	0.661623	108.17	0.508561	56.2965	0.570855	58.8921
553	0.526484	3.86066	0.659785	107.546	0.505912	55.9479	0.584071	57.7854
554	0.543661	3.87863	0.668491	106.901	0.503882	55.6414	0.584175	56.6908
555	0.547478	3.9428	0.66943	106.123	0.493381	55.3207	0.587043	55.7818
556	0.555076	3.95779	0.686495	105.38	0.501051	54.9643	0.591531	54.7227
557	0.546028	3.98469	0.695059	104.858	0.497528	54.6839	0.5924	53.745
558	0.547719	4.01142	0.698198	104.14	0.49683	54.3307	0.587517	52.7432
559	0.548342	4.07243	0.703836	103.276	0.502651	53.889	0.595654	51.6727
560	0.559326	4.09746	0.705128	102.36	0.498915	53.3593	0.593389	50.7247
561	0.561475	4.11353	0.704152	101.436	0.491033	52.8987	0.593169	49.8386
562	0.565081	4.14711	0.692478	100.488	0.483398	52.5392	0.590442	48.9032
563	0.55988	4.16402	0.702643	99.5516	0.492765	52.1533	0.592046	47.8749
564	0.553251	4.19806	0.697746	98.6429	0.491823	51.7446	0.585455	46.9685
565	0.569736	4.20885	0.702362	97.5783	0.486815	51.2805	0.578147	46.1333
566	0.559642	4.22242	0.70105	96.5683	0.49696	50.8399	0.570151	45.2319
567	0.548633	4.21997	0.719698	95.5723	0.515648	50.359	0.568034	44.3507
568	0.53925	4.22142	0.7094	94.6885	0.519938	49.9227	0.5665	43.4771
569	0.533854	4.24397	0.715743	93.6554	0.512863	49.4622	0.557819	42.5392
570	0.527226	4.25793	0.712861	92.5913	0.523247	48.9673	0.544371	41.703
571	0.521598	4.29042	0.724693	91.547	0.52812	48.4389	0.551409	40.8863
572	0.528698	4.30143	0.718475	90.5796	0.523177	47.8478	0.55947	40.0384
573	0.521056	4.31953	0.726632	89.5861	0.537792	47.3011	0.553837	39.1504
574	0.537536	4.31417	0.727442	88.5793	0.544858	46.8334	0.569124	38.3751
575	0.546621	4.32502	0.720706	87.5601	0.536801	46.3449	0.558459	37.6373
576	0.550688	4.33102	0.714772	86.4387	0.529801	45.8974	0.567081	36.8873
577	0.562254	4.34945	0.717098	85.3177	0.524443	45.4231	0.593467	36.1616
578	0.553425	4.35951	0.724213	84.2484	0.521221	44.8784	0.60143	35.3698
579	0.564396	4.34702	0.725244	83.2428	0.527102	44.3422	0.601749	34.6334
580	0.544138	4.36958	0.72178	82.1208	0.509632	43.8888	0.586828	33.8774
581	0.555082	4.36841	0.71385	81.0521	0.514215	43.3971	0.587893	33.2196
582	0.557341	4.39514	0.698382	79.9644	0.505762	42.8722	0.585403	32.5586
583	0.563211	4.4197	0.688839	78.9298	0.510247	42.3706	0.588403	31.8055
584	0.571769	4.43069	0.688746	77.7523	0.500713	41.8227	0.584692	31.0404
585	0.589164	4.42709	0.685785	76.6898	0.499007	41.2567	0.578	30.3261
586	0.584881	4.42064	0.689311	75.6248	0.512211	40.6429	0.587196	29.6778
587	0.585105	4.41785	0.674308	74.4876	0.514547	40.107	0.582537	29.0314
588	0.589249	4.39734	0.689317	73.4472	0.528268	39.5518	0.606605	28.4117
589	0.621932	4.39113	0.69371	72.3452	0.531451	38.9927	0.589523	27.7129
590	0.627294	4.37315	0.693938	71.275	0.524981	38.4952	0.591545	27.0954
591	0.62449	4.34821	0.70016	70.2379	0.537299	37.9406	0.6043	26.4549
592	0.635715	4.33275	0.722156	69.1919	0.55954	37.3954	0.621565	25.8966
593	0.635258	4.32138	0.723462	68.1658	0.573858	36.8636	0.619601	25.3387
594	0.644365	4.32622	0.737665	67.1658	0.56882	36.4328	0.615834	24.7897
595	0.653075	4.32793	0.750307	66.1751	0.574019	35.9317	0.640685	24.2783
596	0.648922	4.33323	0.740126	65.1121	0.577383	35.3792	0.639704	23.7405
597	0.623184	4.31656	0.735378	64.098	0.573087	34.8792	0.653287	23.2124
598	0.610156	4.28118	0.775246	63.1718	0.577892	34.3124	0.669613	22.6779
599	0.627453	4.31459	0.756308	62.1957	0.568049	33.7862	0.667484	22.1613
600	0.62326	4.29124	0.766633	61.2332	0.559979	33.2849	0.657615	21.6766
601	0.633983	4.27346	0.772495	60.1932	0.556653	32.8204	0.650869	21.1807
602	0.64013	4.22392	0.759666	59.1572	0.569807	32.2606	0.654035	20.6749
603	0.646169	4.21125	0.773433	58.2038	0.556177	31.759	0.639126	20.1704
604	0.653799	4.17069	0.76898	57.2239	0.554867	31.3254	0.632082	19.7254
605	0.670583	4.16159	0.785913	56.3647	0.561965	30.8992	0.626218	19.3172
606	0.678488	4.14714	0.756147	55.3447	0.576715	30.4091	0.63278	18.8762
607	0.658273	4.10327	0.765217	54.3609	0.596944	29.9532	0.643355	18.4571
608	0.670251	4.1077	0.758023	53.3871	0.619283	29.5087	0.664021	18.059
609	0.668776	4.09992	0.766474	52.4031	0.623739	29.0552	0.669617	17.6828
610	0.65673	4.09665	0.77933	51.4488	0.622346	28.594	0.684361	17.2708
611	0.650326	4.0712	0.782899	50.5725	0.615807	28.1402	0.693678	16.9091
612	0.646483	4.05626	0.799883	49.683	0.620721	27.7067	0.710827	16.4749
613	0.675173	4.02598	0.806116	48.6787	0.633533	27.2288	0.721868	16.1086
614	0.675474	4.01448	0.8259	47.8321	0.633149	26.7855	0.717876	15.763
615	0.690678	4.00699	0.841816	46.9919	0.631793	26.2907	0.702831	15.4403
616	0.677752	3.95382	0.857445	46.0417	0.610234	25.8121	0.713471	15.1201
617	0.670305	3.91645	0.869925	45.2552	0.622201	25.3372	0.70707	14.7163
618	0.677127	3.89284	0.879606	44.5036	0.620336	24.9142	0.710082	14.3766
619	0.68552	3.8732	0.88115	43.6288	0.640305	24.4721	0.710326	14.0549
620	0.698014	3.82459	0.914609	42.7867	0.636315	23.9652	0.720475	13.7733
621	0.679658	3.80722	0.918778	42.0435	0.656701	23.5643	0.72646	13.4469
622	0.697834	3.79524	0.906613	41.1958	0.646993	23.1851	0.741794	13.1538
623	0.697633	3.73983	0.909891	40.4792	0.64678	22.8199	0.767903	12.8837
624	0.70836	3.76297	0.904617	39.8593	0.646662	22.3884	0.746297	12.535
625	0.727145	3.74918	0.90782	39.111	0.64859	22.0389	0.764328	12.2928
626	0.730701	3.72556	0.910452	38.3313	0.663504	21.6365	0.746796	12.0351
627	0.745082	3.71849	0.907637	37.6558	0.676908	21.2147	0.751471	11.7925
628	0.737976	3.73279	0.881899	36.9596	0.686117	20.868	0.747415	11.513
629	0.751833	3.70534	0.886102	36.2848	0.663442	20.5114	0.756908	11.2509
630	0.7563	3.66012	0.904465	35.6034	0.676679	20.093	0.762689	10.9533
631	0.774263	3.63557	0.905286	34.8668	0.674007	19.747	0.785351	10.6695
632	0.774168	3.58577	0.89772	34.1806	0.691195	19.438	0.79974	10.4379
633	0.794496	3.56907	0.905352	33.5047	0.697373	19.0672	0.788276	10.1687
634	0.807604	3.55334	0.896856	32.8022	0.704236	18.7283	0.811943	9.96312
635	0.83017	3.5062	0.889248	32.2128	0.697029	18.503	0.833937	9.71276
636	0.84665	3.46406	0.915948	31.5964	0.691384	18.1682	0.827978	9.46677
637	0.848587	3.44125	0.906264	30.9839	0.701084	17.8299	0.83556	9.22313
638	0.844267	3.45054	0.89919	30.3729	0.705306	17.5663	0.822778	9.01706
639	0.828135	3.4276	0.895105	29.822	0.712973	17.2567	0.812803	8.79591
640	0.822807	3.34898	0.912095	29.2769	0.709347	16.9848	0.789753	8.62486
641	0.826361	3.33397	0.895888	28.7191	0.72123	16.686	0.789208	8.46623
642	0.827203	3.26345	0.902598	28.241	0.695862	16.402	0.810586	8.27917
643	0.830801	3.24793	0.909911	27.6231	0.706353	16.0622	0.793896	8.12192
644	0.843225	3.26177	0.928926	27.0565	0.710434	15.7895	0.842031	7.94517
645	0.836948	3.26853	0.946238	26.4758	0.685669	15.4764	0.832026	7.77809
646	0.868836	3.21504	0.958284	26.0439	0.686968	15.1698	0.824944	7.66621
647	0.871682	3.18473	0.955845	25.5157	0.712277	14.8677	0.858867	7.45087
648	0.883817	3.17083	0.968782	25.0227	0.70612	14.606	0.899431	7.3064
649	0.892026	3.13947	0.981582	24.5812	0.72181	14.3136	0.910575	7.16231
650	0.921948	3.17753	0.985689	24.1429	0.733253	14.0543	0.929936	7.02301
651	0.897051	3.12701	1.01031	23.6467	0.763082	13.7775	0.955404	6.8738
652	0.907034	3.08312	1.04127	23.2315	0.818678	13.5113	0.955111	6.77866
653	0.94313	3.04783	1.045	22.7589	0.838619	13.255	0.999576	6.64852
654	0.963842	3.07426	1.0784	22.2812	0.86622	12.9898	1.03505	6.51612
655	0.989821	3.06497	1.12585	21.7926	0.868619	12.7343	1.02097	6.40903
656	1.00842	3.06278	1.16332	21.4114	0.920594	12.4637	0.993134	6.2231
657	1.02287	3.02044	1.19481	20.9602	0.892472	12.2611	1.04072	6.08702
658	1.0278	2.97249	1.20783	20.511	0.92867	12.1309	1.07209	5.97159
659	1.04357	2.96198	1.19551	20.1745	0.930382	11.9515	1.07565	5.87034
660	1.06173	2.96171	1.20453	19.7655	0.908164	11.7886	1.04559	5.73806
661	1.07122	2.89513	1.21401	19.4624	0.953441	11.6427	1.04931	5.62343
662	1.07282	2.84804	1.2058	19.0926	0.938085	11.4628	1.05834	5.53698
663	1.08099	2.85271	1.18418	18.6682	0.941427	11.2746	1.0828	5.45405
664	1.09699	2.85642	1.16072	18.2938	0.938937	11.0961	1.09641	5.38015
665	1.09554	2.8155	1.17157	17.939	0.941766	10.8353	1.09648	5.29029
666	1.14439	2.85951	1.16336	17.5307	0.931237	10.5683	1.09639	5.19648
667	1.13156	2.85674	1.19096	17.1922	0.964802	10.3735	1.10302	5.07898
668	1.11502	2.86189	1.21602	16.916	0.965655	10.2332	1.12778	4.97012
669	1.09916	2.89096	1.2737	16.5688	0.960239	10.0325	1.14895	4.88455
670	1.11003	2.86005	1.28399	16.2194	0.971682	9.82834	1.18267	4.79491
671	1.14567	2.87847	1.32499	15.8859	0.987731	9.65784	1.19171	4.68262
672	1.1251	2.87648	1.38797	15.612	1.01375	9.50214	1.1748	4.62254
673	1.11913	2.83884	1.38195	15.3915	1.01378	9.33104	1.16412	4.53517
674	1.13595	2.79642	1.35065	15.0957	1.02383	9.19243	1.18221	4.4498
675	1.16734	2.76444	1.35342	14.6826	1.03907	8.98956	1.18637	4.40581
676	1.1886	2.732	1.31673	14.4051	1.05273	8.81929	1.18154	4.28282
677	1.17201	2.72307	1.30427	14.1199	1.02392	8.69944	1.18543	4.21791
678	1.19936	2.71426	1.30209	13.9878	1.02004	8.57394	1.19515	4.19815
679	1.17068	2.69746	1.28812	13.7655	1.02897	8.44116	1.24847	4.14033
680	1.22618	2.68783	1.30641	13.3725	1.06794	8.25999	1.23907	4.04078
681	1.30597	2.69135	1.35993	13.0575	1.09188	8.11703	1.28829	3.94731
682	1.31747	2.66064	1.41305	12.853	1.14692	8.0218	1.28687	3.91571
683	1.33038	2.62033	1.46966	12.6387	1.18159	7.93432	1.28149	3.836
684	1.37356	2.63479	1.48937	12.4253	1.22553	7.73556	1.31941	3.7783
685	1.35613	2.59499	1.53889	12.1507	1.27225	7.65504	1.32537	3.72775
686	1.39502	2.61156	1.51246	11.8907	1.2984	7.51933	1.34894	3.65939
687	1.43251	2.64119	1.51066	11.7367	1.30905	7.42545	1.36765	3.61059
688	1.41459	2.64573	1.54429	11.5989	1.34675	7.32482	1.40684	3.62913
689	1.40433	2.65984	1.5585	11.3597	1.34503	7.29219	1.43329	3.59804
690	1.36855	2.66899	1.56524	11.1713	1.35094	7.19192	1.43339	3.56485
691	1.38378	2.717	1.53312	10.9791	1.32516	7.09229	1.44054	3.52035
692	1.3886	2.72543	1.51724	10.7593	1.32581	6.96194	1.48412	3.49724
693	1.43913	2.71977	1.55362	10.5896	1.30777	6.78531	1.49987	3.48611
694	1.39645	2.65269	1.60358	10.2966	1.34502	6.71078	1.48609	3.41158
695	1.45248	2.60533	1.63159	10.0909	1.38065	6.63878	1.50285	3.33425
696	1.50394	2.6375	1.70593	9.96916	1.38962	6.48693	1.5173	3.22579
697	1.51012	2.61032	1.7136	9.78105	1.46517	6.3556	1.49893	3.17156
698	1.51091	2.61522	1.80001	9.56265	1.45931	6.27004	1.55608	3.16606
699	1.52147	2.62393	1.81367	9.42907	1.52092	6.16514	1.56654	3.13932
700	1.57702	2.62032	1.82743	9.28556	1.56027	6.09739	1.55116	3.08037
701	1.55489	2.62558	1.81587	9.1085	1.60278	5.9714	1.58389	3.03348
702	1.53049	2.62443	1.83499	8.98135	1.55546	5.90754	1.56492	3.06281
703	1.54872	2.61134	1.80992	8.84853	1.53106	5.90188	1.58624	3.05359
704	1.52958	2.63611	1.83835	8.67014	1.50065	5.81415	1.62328	3.00115
705	1.53501	2.59592	1.80202	8.54385	1.5221	5.78601	1.64726	3.0042
706	1.48334	2.62536	1.82257	8.44065	1.53349	5.77156	1.64196	2.97755
707	1.48309	2.63482	1.77915	8.27089	1.54882	5.78968	1.65632	2.96526
708	1.5373	2.58683	1.83409	8.30019	1.57003	5.72139	1.69899	2.93185
709	1.51044	2.6201	1.84755	8.16287	1.62509	5.58047	1.69738	2.94439
710	1.52923	2.62175	1.88394	7.97354	1.67922	5.56802	1.72109	2.94855
711	1.5765	2.60749	1.87523	7.83722	1.68774	5.47377	1.72467	2.97514
712	1.64707	2.72185	1.87219	7.72331	1.69698	5.43547	1.71831	2.99847
713	1.71105	2.79554	1.86833	7.6376	1.6795	5.35003	1.71422	2.99806
714	1.8198	2.78489	1.99195	7.6148	1.72301	5.29464	1.79944	3.05587
715	1.94426	2.86943	2.07236	7.44545	1.83082	5.31066	1.88118	3.08572
716	2.07258	2.87809	2.19111	7.44059	1.87141	5.36864	1.91899	3.13511
717	2.23156	3.02567	2.32567	7.4361	1.98579	5.32123	2.07844	3.16348
718	2.49605	3.19226	2.596	7.40161	2.10971	5.35116	2.28019	3.19004
719	2.6989	3.26755	2.76585	7.40861	2.35644	5.46165	2.47583	3.30706
720	2.9312	3.4096	2.97959	7.47414	2.64053	5.52217	2.74329	3.41139
721	3.10086	3.60746	3.219	7.40057	2.85296	5.62327	2.95913	3.61398
722	3.33755	3.8773	3.48938	7.44291	3.02574	5.74221	3.20122	3.75186
723	3.54678	4.11473	3.69005	7.47558	3.26526	5.86158	3.45928	3.8743
724	3.7558	4.25986	3.87718	7.4826	3.4571	5.92863	3.70705	3.96033
725	3.82898	4.3942	3.96573	7.52289	3.64406	6.08377	3.83199	4.04992
726	3.90556	4.48663	4.08776	7.54473	3.70011	6.08312	3.88808	4.07475
727	3.87156	4.46644	4.18041	7.40875	3.70555	6.07449	3.87186	4.09476
728	3.81368	4.3551	4.12775	7.324	3.6653	5.97383	3.82528	4.0255
729	3.71243	4.25033	4.01585	7.19705	3.5404	5.7755	3.73369	3.9335
730	3.49912	4.10133	3.89475	7.03072	3.34264	5.6471	3.55712	3.82875
731	3.26553	3.95952	3.65502	6.85438	3.17559	5.39484	3.3376	3.80204
732	3.06249	3.67686	3.43911	6.67448	2.99153	5.12544	3.14895	3.68106
733	2.87545	3.52911	3.25047	6.46519	2.78266	4.94568	2.98585	3.57684
734	2.72726	3.32739	3.01831	6.33966	2.63716	4.70396	2.73589	3.52127
735	2.58494	3.24314	2.9126	6.16243	2.54155	4.61963	2.64199	3.42679
736	2.55894	3.16562	2.85043	6.0437	2.51025	4.51457	2.40351	3.3532
737	2.502	3.03071	2.72459	5.85645	2.43685	4.49085	2.42215	3.2588
738	2.43671	3.03338	2.70068	5.73869	2.31151	4.47041	2.32018	3.13898
739	2.42413	2.99316	2.77308	5.70755	2.29379	4.47176	2.28104	3.12115
740	2.38209	3.06417	2.82079	5.60461	2.31599	4.50586	2.2214	3.06167
741	2.44024	3.00483	2.90658	5.50478	2.31024	4.62201	2.26697	3.10377
742	2.45981	3.11163	2.8682	5.50888	2.37933	4.64809	2.33015	3.129
743	2.40835	3.04289	2.81762	5.51514	2.37972	4.68109	2.37329	3.10387
744	2.39456	3.07478	2.95307	5.44085	2.4336	4.65963	2.31879	3.10318
745	2.512	3.06481	2.9699	5.56016	2.46361	4.54909	2.39378	3.12893
746	2.65006	3.03319	2.91117	5.47631	2.46137	4.58005	2.41582	3.15574
747	2.81695	3.08593	2.86584	5.45083	2.46381	4.58027	2.37901	3.26227
748	2.85021	3.13042	2.80623	5.48645	2.50404	4.54518	2.46011	3.27125
749	2.85202	3.09946	2.8284	5.52863	2.65346	4.4072	2.512	3.25795
750	2.98806	3.03476	2.83816	5.35588	2.66732	4.42053	2.45516	3.22776
751	3.07911	3.09202	2.82294	5.28475	2.76553	4.38025	2.51269	3.36514
752	3.08755	3.0264	2.88683	5.24255	2.79372	4.3536	2.50294	3.40255
753	3.12691	3.0516	2.99455	5.15243	2.83002	4.32186	2.63616	3.51823
754	2.99556	3.14226	2.98496	5.13925	2.81717	4.30314	2.60981	3.57164
755	3.00542	3.17424	3.11355	5.2085	2.78854	4.32787	2.57283	3.56826
756	3.11908	3.206	3.18089	5.1586	2.73297	4.28205	2.72317	3.70194
757	3.05515	3.3577	3.25046	5.15981	2.73691	4.29711	2.78741	3.76953
758	3.10978	3.44867	3.34191	5.28031	2.65898	4.34616	2.76113	3.87924
759	3.01082	3.42051	3.4865	5.23817	2.57869	4.39544	2.73765	3.98412
760	3.02368	3.52752	3.44417	5.40133	2.6013	4.48032	2.64258	3.99503
761	3.10463	3.5363	3.54463	5.4291	2.4888	4.59313	2.77343	4.02599
762	3.20913	3.48868	3.64257	5.44018	2.57221	4.55809	2.94329	4.00551
763	3.18227	3.56867	3.61173	5.53941	2.63309	4.67257	2.87737	4.03886
764	3.19851	3.61831	3.6948	5.4601	2.70577	4.71992	2.97019	4.13241
765	3.14977	3.64336	3.886	5.52249	2.7957	4.62801	3.02878	4.12591
766	3.26267	3.90816	3.86807	5.58958	2.84002	4.62067	3.13198	3.98031
767	3.26232	3.91792	3.86981	5.43259	2.92255	4.54568	3.34913	3.92546
768	3.37436	4.13793	4.06387	5.46923	3.09878	4.60436	3.38434	3.90565
769	3.34057	4.11837	4.09125	5.44182	3.1034	4.64384	3.40143	4.06379
770	3.37048	4.25975	4.3592	5.41752	3.10923	4.59157	3.32725	3.9966
771	3.51553	4.24389	4.38026	5.37432	3.18418	4.63527	3.30432	4.08864
772	3.5361	4.14043	4.27755	5.39347	3.27108	4.76069	3.40643	4.03581
773	3.71971	4.15271	4.31321	5.40923	3.40523	4.8541	3.47251	4.07538
774	3.7945	4.22286	4.49425	5.33405	3.57619	4.8062	3.35626	4.14522
775	3.79638	4.07767	4.2967	5.15734	3.62564	4.7749	3.36953	4.16109
776	3.86753	4.12512	4.3252	5.12238	3.83791	4.72611	3.42358	4.20071
777	4.03191	4.23954	4.27095	5.03556	3.83403	4.82473	3.5757	4.24244
778	3.90682	4.24894	4.35765	5.12541	3.89128	4.92324	3.58931	4.24004
779	4.03767	4.28546	4.34614	5.08017	3.91583	4.89214	3.68275	4.37386
780	4.13783	4.36223	4.26357	5.2029	3.88422	4.84294	3.72568	4.41608
781	4.28117	4.35849	4.53358	5.36772	3.74544	5.03334	3.9329	4.58378
782	4.29518	4.40216	4.63685	5.54041	3.9602	5.03701	3.97885	4.75801
783	4.4554	4.5305	4.74428	5.51394	3.89383	5.01459	4.15731	4.79802
784	4.49545	4.45369	4.75542	5.7272	4.01467	4.95078	4.26553	4.76001
785	4.71272	4.41737	4.85365	5.74887	3.99493	4.79648	4.41406	4.92526
786	4.77289	4.57756	4.95661	5.7651	4.07019	4.74484	4.39376	5.08431
787	4.86074	4.64286	5.07186	5.68582	4.21085	4.9714	4.52214	5.34173
788	4.75111	4.79879	4.83066	5.62243	4.41506	5.0403	4.61225	5.39187
789	4.79937	5.04244	4.8522	5.61714	4.20857	5.26454	4.71507	5.42209
790	4.74925	5.14719	4.85456	5.6668	4.15422	5.42499	4.83568	5.48345
791	4.56757	5.14908	4.81896	5.68815	4.03391	5.38727	4.76303	5.64196
792	4.57974	5.22196	4.80272	5.71712	4.15316	5.26322	4.72706	5.70173
793	4.50983	5.2573	4.89135	5.66003	4.27545	5.42438	4.82274	5.58832
794	4.44836	5.25613	5.07293	5.75908	4.38955	5.40281	4.73267	5.58891
795	4.61987	5.24412	5.13292	5.85839	4.50585	5.39744	4.82674	5.82809
796	4.59073	5.13285	5.18825	6.10217	4.71002	5.21122	4.98473	5.92006
797	4.72677	5.00187	5.31412	6.20485	5.02375	5.22289	4.93339	5.95136
798	4.97013	5.01958	5.36895	6.25215	5.27642	5.45265	4.81311	6.02081
799	5.16789	5.19555	5.53656	6.40812	5.31121	5.75085	4.87271	6.06697
800	5.35947	5.23381	5.63106	6.53519	5.47836	5.75801	4.89889	6.26595
