# Supplementary material for: Genetic encoding of a highly photostable, long lifetime fluorescent amino acid for imaging in mammalian cells
Source: Chem Sci. 2021 Aug 3;12(36):11955–64. doi: 10.1039/d1sc01914g (PMC8634729; doi:10.1039/d1sc01914g)
Supplement: SC-012-D1SC01914G-s017 [file SC-012-D1SC01914G-s017.xlsx]

## Sheet: Sheet1
Wavelength	H2O_Incident	H2O_Sample	DMSO_Incident	DMSO_Sample	MeOH_Incident	MeOH_Sample	THF_Incident	THF_Sample
350	4.08662	1.40714	3.74205	1.43406	3.86362	1.40714	4.10784	2.15016
351	15.0146	4.88577	14.2398	4.86845	14.6984	4.88577	15.0244	7.43661
352	53.6444	17.1924	51.313	16.8891	52.813	17.1924	53.2616	26.1368
353	153.46	49.4388	147.104	48.3857	151.871	49.4388	152.765	75.0743
354	359.431	116.339	345.696	113.892	356.588	116.339	359.461	177.525
355	719.724	234.413	694.176	229.413	714.359	234.413	721.488	358.793
356	1260.29	412.621	1215.68	402.717	1250.92	412.621	1262.28	631.432
357	1963.53	646.254	1890.04	628.928	1948.16	646.254	1962.55	987.123
358	2754.76	910.805	2648.7	884.917	2737.94	910.805	2753.24	1390.82
359	3563.02	1183.04	3423.79	1148.7	3546.05	1183.04	3560.94	1805.72
360	4296.32	1433.05	4129.15	1389.82	4281.03	1433.05	4292.07	2186.47
361	4949.8	1662.53	4768.5	1607.38	4948.71	1662.53	4949.7	2538.56
362	5035.74	1696.62	4854.32	1638.65	5037.01	1696.62	5036.9	2591.21
363	5019.15	1696.45	4842.05	1636.67	5022.09	1696.45	5019.86	2591.62
364	4744.63	1608.06	4575.82	1550.13	4744.96	1608.06	4743.75	2455.92
365	4231.07	1438.37	4078.95	1385.73	4232.44	1438.37	4229.65	2197.33
366	3535.78	1207.86	3410.29	1162.19	3545.43	1207.86	3537.08	1845.69
367	2743.45	943.107	2646.83	905.242	2755.69	943.107	2746.46	1439.96
368	1953.2	675.716	1883.8	647.22	1961.16	675.716	1957.59	1030.05
369	1261.19	437.865	1215.75	419.776	1263.99	437.865	1265.02	668.668
370	724.985	252.959	699.084	242.962	726.334	252.959	725.873	387.473
371	361.547	127.582	349.803	122.276	362.841	127.582	361.677	195.623
372	150.263	53.6728	144.673	51.2101	150.164	53.6728	150.089	82.4758
373	49.709	18.0007	47.8808	17.2086	49.1839	18.0007	49.8414	28.3224
374	13.1955	4.89975	12.6992	4.75816	12.847	4.89975	13.2117	8.8014
375	3.4361	1.34478	3.26418	1.40215	3.1857	1.34478	3.47868	3.9168
376	1.80662	0.757114	1.73443	0.856247	1.64174	0.757114	1.86	3.55112
377	1.46218	0.643073	1.39288	0.761785	1.30491	0.643073	1.50642	3.96419
378	1.28088	0.582161	1.21179	0.727887	1.12771	0.582161	1.31758	4.56901
379	1.11193	0.529991	1.05788	0.71018	0.960041	0.529991	1.15122	5.32477
380	0.961198	0.478418	0.923542	0.726104	0.827422	0.478418	1.01474	6.25506
381	0.859488	0.451697	0.812742	0.762603	0.724749	0.451697	0.896135	7.36417
382	0.790254	0.430639	0.73456	0.829941	0.644066	0.430639	0.807377	8.70241
383	0.738122	0.416246	0.679826	0.925809	0.592587	0.416246	0.744197	10.2251
384	0.697943	0.415654	0.650496	1.06412	0.554491	0.415654	0.698806	12.0454
385	0.68194	0.422327	0.636238	1.24484	0.528017	0.422327	0.674142	14.1088
386	0.67073	0.426699	0.630375	1.47072	0.509456	0.426699	0.658206	16.4344
387	0.666341	0.445	0.628469	1.7429	0.492776	0.445	0.648423	18.9466
388	0.667625	0.462255	0.633578	2.07816	0.495788	0.462255	0.642278	21.7575
389	0.672358	0.480085	0.632043	2.49513	0.493906	0.480085	0.631152	24.8681
390	0.681274	0.503331	0.640266	2.97968	0.492129	0.503331	0.634214	28.2818
391	0.671329	0.535985	0.659329	3.55508	0.494439	0.535985	0.643374	31.9236
392	0.679266	0.574531	0.677189	4.25078	0.491159	0.574531	0.648086	35.7871
393	0.699047	0.622444	0.707399	5.08009	0.497951	0.622444	0.663024	39.8339
394	0.708174	0.676817	0.7436	6.06719	0.510428	0.676817	0.676036	44.197
395	0.719997	0.744726	0.792834	7.23048	0.530839	0.744726	0.691744	48.7522
396	0.728224	0.820249	0.851214	8.6138	0.545971	0.820249	0.712854	53.5982
397	0.738078	0.903399	0.922346	10.2502	0.552512	0.903399	0.730046	58.6585
398	0.751057	1.01086	1.00123	12.1129	0.572563	1.01086	0.765734	63.9106
399	0.768587	1.13654	1.108	14.2812	0.590406	1.13654	0.79702	69.1033
400	0.792676	1.27263	1.22965	16.7461	0.623375	1.27263	0.825807	74.4033
401	0.809276	1.42737	1.37217	19.5709	0.658538	1.42737	0.870333	79.8758
402	0.821864	1.60584	1.51865	22.8658	0.687971	1.60584	0.908559	85.4989
403	0.841871	1.79891	1.6821	26.5796	0.722027	1.79891	0.955555	91.1212
404	0.85991	2.02297	1.84546	30.6918	0.746797	2.02297	0.998392	96.7736
405	0.88987	2.26899	2.00346	35.2299	0.773311	2.26899	1.02677	102.199
406	0.912604	2.55031	2.15467	40.1905	0.809623	2.55031	1.04934	107.36
407	0.954275	2.87879	2.3058	45.7347	0.825025	2.87879	1.05283	112.57
408	0.978074	3.24623	2.42218	51.7851	0.845608	3.24623	1.05826	117.804
409	1.00709	3.67114	2.53003	58.4282	0.85938	3.67114	1.06345	122.977
410	1.03884	4.14027	2.61773	65.6308	0.871166	4.14027	1.06269	127.85
411	1.06866	4.65021	2.657	73.3769	0.890164	4.65021	1.04734	132.449
412	1.08922	5.23026	2.69475	81.5642	0.895839	5.23026	1.04071	136.666
413	1.10645	5.87899	2.71167	90.2657	0.899074	5.87899	1.02679	140.605
414	1.1144	6.61734	2.71201	99.5714	0.896244	6.61734	1.01963	144.46
415	1.10301	7.41091	2.69832	109.337	0.895232	7.41091	1.01454	147.98
416	1.10378	8.31827	2.67808	119.535	0.897781	8.31827	1.00606	151.129
417	1.11453	9.3063	2.64628	130.267	0.906791	9.3063	1.00634	154.013
418	1.09702	10.3847	2.60505	141.373	0.902792	10.3847	1.01082	156.481
419	1.07947	11.5592	2.55346	152.9	0.902032	11.5592	1.01301	158.593
420	1.07604	12.8703	2.5156	164.672	0.903745	12.8703	1.02076	160.313
421	1.07667	14.3063	2.46777	176.686	0.914085	14.3063	1.02074	161.753
422	1.07174	15.8647	2.43445	189.025	0.923123	15.8647	1.0226	162.93
423	1.07143	17.5671	2.40798	201.464	0.947798	17.5671	1.02952	163.694
424	1.07412	19.4363	2.38538	214.079	0.968319	19.4363	1.04323	164.193
425	1.08521	21.4532	2.3634	226.767	0.988738	21.4532	1.04805	164.444
426	1.08433	23.642	2.34767	239.353	1.0012	23.642	1.05149	164.406
427	1.09234	26.017	2.36093	251.912	1.01828	26.017	1.05417	164.018
428	1.1055	28.5932	2.37983	264.076	1.04554	28.5932	1.06133	163.465
429	1.11099	31.3375	2.40312	276.395	1.05954	31.3375	1.06236	162.894
430	1.11266	34.2908	2.41493	288.644	1.07567	34.2908	1.07063	162.001
431	1.12058	37.4745	2.43338	300.49	1.09405	37.4745	1.0763	160.761
432	1.12729	40.8362	2.45131	311.813	1.11557	40.8362	1.07483	159.506
433	1.13271	44.366	2.47205	322.837	1.12744	44.366	1.07034	157.898
434	1.13219	48.0993	2.50591	333.368	1.14853	48.0993	1.0755	156.066
435	1.13001	52.0081	2.52364	343.299	1.16876	52.0081	1.07572	154.213
436	1.1211	56.2252	2.51083	352.924	1.18963	56.2252	1.06901	152.27
437	1.10745	60.6446	2.50223	362.087	1.19987	60.6446	1.0695	150.201
438	1.10407	65.1894	2.48879	370.654	1.2296	65.1894	1.06049	147.864
439	1.0971	69.9718	2.47781	378.512	1.25731	69.9718	1.06955	145.621
440	1.08641	74.9561	2.4519	386.028	1.27978	74.9561	1.06529	143.277
441	1.07254	80.1319	2.40702	392.965	1.3058	80.1319	1.06475	140.833
442	1.07179	85.5402	2.36749	398.808	1.33382	85.5402	1.05936	138.215
443	1.0653	91.167	2.30715	404.142	1.36482	91.167	1.05674	135.487
444	1.07282	97.052	2.2576	408.94	1.39792	97.052	1.04898	132.691
445	1.07897	103.026	2.19494	413.243	1.4226	103.026	1.04781	129.881
446	1.08053	109.053	2.14354	416.52	1.45498	109.053	1.03218	126.938
447	1.08499	115.322	2.08163	419.193	1.47776	115.322	1.03053	124.041
448	1.0777	121.886	2.01939	421.704	1.5156	121.886	1.01426	121.14
449	1.07594	128.522	1.9693	423.44	1.53784	128.522	1.01581	118.199
450	1.08009	135.183	1.9289	424.249	1.56777	135.183	1.0089	115.113
451	1.07464	141.977	1.88278	424.715	1.59628	141.977	1.01212	112.224
452	1.06632	148.885	1.84918	424.802	1.61931	148.885	1.00589	109.448
453	1.0564	155.926	1.80459	424.018	1.65664	155.926	1.00341	106.628
454	1.04401	162.968	1.76655	422.858	1.69263	162.968	1.00075	103.758
455	1.03914	170.004	1.73458	421.223	1.71389	170.004	0.999867	100.939
456	1.03078	177.028	1.71709	418.865	1.75292	177.028	1.00206	98.208
457	1.03369	183.95	1.69921	415.948	1.79028	183.95	1.00245	95.423
458	1.03132	191.026	1.67031	412.603	1.82488	191.026	0.995319	92.7737
459	1.0257	198.097	1.64771	409.105	1.85853	198.097	0.992951	90.173
460	1.03201	204.866	1.62395	404.971	1.9008	204.866	0.974339	87.5301
461	1.02521	211.416	1.59646	400.431	1.93213	211.416	0.97539	84.9229
462	1.02112	217.772	1.58566	395.257	1.95729	217.772	0.96585	82.257
463	1.02523	223.924	1.57916	389.471	1.9932	223.924	0.978315	79.6057
464	1.0128	230.018	1.57192	383.558	2.03291	230.018	0.970648	77.084
465	1.01754	235.886	1.55913	377.601	2.05529	235.886	0.957901	74.6186
466	1.0148	241.71	1.54292	371.609	2.08184	241.71	0.959301	72.1482
467	1.01641	247.123	1.53513	365.294	2.1109	247.123	0.956983	69.7957
468	0.999836	252.373	1.52777	358.87	2.12956	252.373	0.955957	67.4791
469	0.997154	257.578	1.51006	352.326	2.14841	257.578	0.960701	65.2708
470	1.00611	262.166	1.48069	345.409	2.15692	262.166	0.950463	63.0684
471	1.01915	266.28	1.45655	338.266	2.17236	266.28	0.944189	60.8786
472	1.01531	270.344	1.42637	331.328	2.17652	270.344	0.932319	58.8158
473	1.01498	274.251	1.3937	324.525	2.19217	274.251	0.930536	56.7696
474	1.019	277.895	1.36777	317.254	2.20346	277.895	0.932535	54.8352
475	1.01539	280.811	1.33747	309.757	2.211	280.811	0.932183	52.9073
476	1.01381	283.516	1.30708	302.377	2.2163	283.516	0.9202	51.0271
477	1.0149	285.978	1.29	295.112	2.22509	285.978	0.91339	49.1688
478	1.00495	288.042	1.26994	287.681	2.22859	288.042	0.919309	47.2886
479	0.988718	289.677	1.25584	280.272	2.22212	289.677	0.921704	45.5551
480	0.984729	291.051	1.23846	272.885	2.2226	291.051	0.918371	43.8481
481	0.979679	292.03	1.22122	265.386	2.22132	292.03	0.917793	42.2761
482	0.966999	292.722	1.1927	257.986	2.22369	292.722	0.912404	40.6929
483	0.957184	292.946	1.16824	250.788	2.21675	292.946	0.914052	39.222
484	0.957566	292.93	1.1497	243.566	2.19934	292.93	0.909457	37.7216
485	0.966592	292.616	1.14579	236.308	2.19473	292.616	0.911358	36.2487
486	0.971719	291.781	1.13219	229.127	2.18039	291.781	0.910087	34.8569
487	0.975183	290.411	1.11126	222.069	2.16064	290.411	0.911563	33.493
488	0.982342	288.745	1.09503	215.145	2.14967	288.745	0.900054	32.1645
489	0.978696	286.585	1.07766	208.132	2.13918	286.585	0.89889	30.8448
490	0.98953	284.093	1.06427	201.279	2.11495	284.093	0.926681	29.5878
491	0.991799	281.586	1.0552	194.86	2.08495	281.586	0.942676	28.3768
492	0.996855	279.099	1.04943	188.749	2.06799	279.099	0.952452	27.2246
493	1.00056	276.794	1.04176	183.025	2.07836	276.794	0.953259	26.2695
494	1.01391	274.688	1.03891	177.783	2.08419	274.688	0.959758	25.3843
495	1.03404	272.777	1.0433	172.871	2.10619	272.777	0.976995	24.534
496	1.05215	271.269	1.05238	168.217	2.10778	271.269	1.00871	23.7112
497	1.07414	269.383	1.07166	163.577	2.10799	269.383	1.02228	22.895
498	1.10497	266.736	1.0688	158.798	2.1184	266.736	1.02335	22.0463
499	1.13136	263.926	1.09059	153.726	2.12003	263.926	1.02382	21.2323
500	1.14523	260.627	1.11081	148.768	2.13714	260.627	1.01987	20.4663
501	1.15807	257.304	1.12378	143.876	2.11762	257.304	1.0163	19.6392
502	1.1725	253.443	1.13365	138.86	2.08783	253.443	1.04515	18.8967
503	1.19095	249.501	1.13053	133.94	2.06304	249.501	1.06002	18.1633
504	1.19922	245.117	1.13352	129.1	2.03765	245.117	1.0582	17.4931
505	1.20722	240.201	1.12611	124.172	2.01367	240.201	1.06697	16.771
506	1.20156	235.247	1.10108	119.357	1.98954	235.247	1.07202	16.0442
507	1.19348	230.134	1.10407	114.864	1.93614	230.134	1.06764	15.3411
508	1.18576	225.057	1.08277	110.409	1.89265	225.057	1.08579	14.704
509	1.17337	219.943	1.05751	106.186	1.86335	219.943	1.08527	14.1239
510	1.1709	215.183	1.05484	102.155	1.82878	215.183	1.06643	13.5789
511	1.15334	210.422	1.04144	98.4755	1.80875	210.422	1.05726	12.9691
512	1.1362	205.807	1.03958	94.9231	1.78244	205.807	1.05101	12.4208
513	1.12145	201.362	1.03032	91.615	1.74198	201.362	1.04102	11.9309
514	1.13099	196.935	1.03442	88.3019	1.71333	196.935	1.03092	11.4632
515	1.14386	192.494	1.03086	85.1148	1.68772	192.494	1.01545	11.0527
516	1.1438	188.079	1.01533	82.0162	1.66141	188.079	0.997674	10.6225
517	1.1427	183.737	1.00856	79.1237	1.64422	183.737	0.989659	10.2368
518	1.12908	179.296	0.999206	76.2264	1.63031	179.296	0.986768	9.83312
519	1.12415	174.852	1.01151	73.4162	1.60565	174.852	0.984372	9.47397
520	1.11589	170.348	0.985011	70.7272	1.56485	170.348	0.978766	9.11655
521	1.1151	166.085	0.969753	68.086	1.54855	166.085	0.972953	8.7523
522	1.11152	161.74	0.939976	65.5239	1.49234	161.74	0.960552	8.40456
523	1.07725	157.249	0.91556	63.0159	1.46113	157.249	0.947721	8.08001
524	1.06273	152.863	0.88754	60.7168	1.42334	152.863	0.95078	7.769
525	1.03694	148.622	0.880137	58.4425	1.37654	148.622	0.944918	7.45701
526	1.02445	144.654	0.855175	56.2767	1.34006	144.654	0.941968	7.19113
527	1.01908	140.758	0.832144	54.149	1.30758	140.758	0.939152	6.92783
528	1.0096	136.91	0.810804	52.1329	1.28856	136.91	0.926337	6.6824
529	0.993204	133.003	0.798271	50.1926	1.26466	133.003	0.91629	6.4173
530	0.984238	129.238	0.801688	48.2876	1.26053	129.238	0.919562	6.18594
531	0.986134	125.678	0.810359	46.5009	1.23994	125.678	0.914035	5.96115
532	0.981516	122.153	0.79977	44.7364	1.22305	122.153	0.906111	5.73194
533	0.982757	118.771	0.789244	43.0579	1.20974	118.771	0.900732	5.54748
534	0.997579	115.364	0.795526	41.4725	1.19607	115.364	0.891419	5.35598
535	0.976857	112.045	0.80804	39.9318	1.16512	112.045	0.874469	5.16777
536	0.965009	108.789	0.80346	38.44	1.15315	108.789	0.873117	4.96919
537	0.95315	105.514	0.798672	36.9565	1.13306	105.514	0.864046	4.80839
538	0.941902	102.333	0.790267	35.5479	1.11389	102.333	0.859038	4.634
539	0.934727	99.3038	0.783471	34.2538	1.0919	99.3038	0.855703	4.47781
540	0.930647	96.6994	0.778964	33.0916	1.08283	96.6994	0.84946	4.37015
541	0.838667	93.2104	0.64025	31.5246	0.96687	93.2104	0.773459	4.10383
542	0.847358	90.5944	0.651984	30.3969	0.958152	90.5944	0.77802	3.94752
543	0.839744	87.8719	0.643885	29.2381	0.932055	87.8719	0.769726	3.82317
544	0.842703	85.2306	0.660945	28.1542	0.921737	85.2306	0.755784	3.72396
545	0.844458	82.6634	0.66353	27.1922	0.895558	82.6634	0.768665	3.59803
546	0.846679	80.1847	0.654096	26.1931	0.872709	80.1847	0.764627	3.48256
547	0.856458	77.7528	0.647835	25.2107	0.863121	77.7528	0.754608	3.36716
548	0.849769	75.4095	0.664284	24.2416	0.845626	75.4095	0.766813	3.26643
549	0.848919	73.0832	0.649028	23.3117	0.822219	73.0832	0.747483	3.15704
550	0.85195	70.7682	0.643105	22.4784	0.793308	70.7682	0.747526	3.06627
551	0.853904	68.5582	0.632572	21.6188	0.77051	68.5582	0.743606	2.96765
552	0.852597	66.4134	0.619047	20.8345	0.764262	66.4134	0.735918	2.87375
553	0.848534	64.3474	0.610456	20.0266	0.751377	64.3474	0.738267	2.79118
554	0.847918	62.375	0.605969	19.2306	0.739911	62.375	0.726109	2.70152
555	0.841176	60.4106	0.601142	18.5582	0.72891	60.4106	0.719943	2.61016
556	0.848705	58.5389	0.59853	17.8846	0.73236	58.5389	0.737357	2.52583
557	0.865212	56.7355	0.597721	17.2531	0.735584	56.7355	0.751292	2.46745
558	0.869557	54.9298	0.599065	16.5842	0.710295	54.9298	0.751162	2.40146
559	0.867356	53.1602	0.599423	16.0115	0.713587	53.1602	0.771854	2.33384
560	0.864396	51.5213	0.609174	15.4156	0.704058	51.5213	0.790006	2.25512
561	0.871504	49.8442	0.606036	14.8386	0.683855	49.8442	0.780924	2.19289
562	0.874058	48.271	0.612712	14.3163	0.686657	48.271	0.787787	2.13711
563	0.867971	46.7622	0.606885	13.7883	0.689429	46.7622	0.785836	2.10962
564	0.878001	45.2609	0.60926	13.2974	0.694754	45.2609	0.780701	2.06396
565	0.872564	43.7906	0.609766	12.7904	0.666694	43.7906	0.77215	2.01431
566	0.866072	42.4074	0.607721	12.3359	0.658542	42.4074	0.760831	1.95591
567	0.865983	41.0307	0.597653	11.8902	0.64876	41.0307	0.74935	1.89911
568	0.875972	39.7209	0.583333	11.4386	0.654165	39.7209	0.748206	1.85029
569	0.868534	38.4798	0.593522	11.0398	0.649779	38.4798	0.757173	1.81851
570	0.877766	37.2114	0.594012	10.6044	0.653118	37.2114	0.76292	1.76332
571	0.867696	35.9737	0.600114	10.1979	0.652475	35.9737	0.773228	1.71166
572	0.868151	34.8895	0.597692	9.84454	0.64778	34.8895	0.76901	1.67421
573	0.879771	33.8916	0.588877	9.48924	0.63862	33.8916	0.780903	1.65941
574	0.88355	32.7875	0.604611	9.11293	0.631448	32.7875	0.783802	1.62912
575	0.886726	31.7528	0.62761	8.82705	0.634186	31.7528	0.781272	1.61998
576	0.896661	30.7995	0.625519	8.50193	0.622714	30.7995	0.788737	1.5901
577	0.9069	29.8424	0.62528	8.20927	0.627682	29.8424	0.795581	1.57164
578	0.898481	28.8961	0.622771	7.95691	0.628673	28.8961	0.811423	1.55512
579	0.915016	27.9998	0.62805	7.6903	0.618451	27.9998	0.820509	1.55832
580	0.921728	27.0612	0.617446	7.37217	0.601714	27.0612	0.839624	1.51872
581	0.913899	26.17	0.628002	7.14419	0.602666	26.17	0.83307	1.48455
582	0.928597	25.3698	0.639022	6.93905	0.605372	25.3698	0.849471	1.47296
583	0.91038	24.5992	0.634346	6.7044	0.591217	24.5992	0.869961	1.44464
584	0.903516	23.8103	0.635227	6.49734	0.589576	23.8103	0.868273	1.42107
585	0.89742	23.1066	0.621389	6.26521	0.583582	23.1066	0.88006	1.40965
586	0.896905	22.3837	0.63416	6.04663	0.59105	22.3837	0.873611	1.39596
587	0.903256	21.7356	0.625036	5.84	0.572879	21.7356	0.887773	1.3856
588	0.920375	21.0687	0.633303	5.66903	0.581902	21.0687	0.888543	1.39368
589	0.949629	20.4508	0.630505	5.50859	0.574698	20.4508	0.895814	1.36555
590	0.971163	19.8316	0.631794	5.30962	0.565993	19.8316	0.902314	1.35926
591	0.984954	19.1929	0.64031	5.10853	0.571323	19.1929	0.916088	1.34888
592	1.01026	18.5709	0.655023	4.95561	0.580358	18.5709	0.914503	1.34176
593	1.0149	17.964	0.686276	4.81033	0.580726	17.964	0.904932	1.33006
594	1.04333	17.3869	0.673725	4.65706	0.576036	17.3869	0.915205	1.33605
595	1.05562	16.8384	0.683472	4.52156	0.561995	16.8384	0.916075	1.312
596	1.04333	16.3595	0.69529	4.39804	0.565359	16.3595	0.925127	1.29662
597	1.03643	15.8873	0.685001	4.24127	0.567065	15.8873	0.933223	1.29693
598	1.03457	15.421	0.677756	4.10534	0.565359	15.421	0.931252	1.28615
599	1.02306	14.9787	0.678721	4.00175	0.560177	14.9787	0.949262	1.27605
600	1.01444	14.5312	0.675479	3.87486	0.536325	14.5312	0.954239	1.27634
601	1.0323	14.1288	0.665136	3.74988	0.529995	14.1288	0.962775	1.26144
602	1.02474	13.7507	0.670523	3.65601	0.51754	13.7507	0.983657	1.23425
603	1.03343	13.3434	0.671881	3.54496	0.54103	13.3434	0.997988	1.22716
604	1.07058	12.9749	0.665496	3.42621	0.554801	12.9749	0.991087	1.2284
605	1.07833	12.5899	0.673096	3.34252	0.530113	12.5899	1.00029	1.20982
606	1.10013	12.1964	0.696008	3.25068	0.54517	12.1964	0.9883	1.19055
607	1.12227	11.839	0.686552	3.16365	0.560318	11.839	0.963607	1.1828
608	1.15722	11.5041	0.685912	3.10328	0.586537	11.5041	0.976331	1.16454
609	1.15804	11.1593	0.680928	3.02447	0.583143	11.1593	0.979056	1.15661
610	1.18234	10.8411	0.670817	2.95315	0.587074	10.8411	0.982154	1.15545
611	1.18922	10.5071	0.670484	2.8803	0.578759	10.5071	0.97244	1.14327
612	1.17919	10.1696	0.690112	2.80841	0.58719	10.1696	0.985395	1.13883
613	1.19247	9.85495	0.709012	2.72485	0.629393	9.85495	0.983083	1.14781
614	1.18708	9.5743	0.695879	2.65472	0.601435	9.5743	1.01697	1.16043
615	1.19786	9.31247	0.698737	2.58367	0.592605	9.31247	1.03654	1.17777
616	1.19117	9.04534	0.689382	2.49499	0.599332	9.04534	1.04455	1.1731
617	1.19495	8.77662	0.678557	2.43867	0.591823	8.77662	1.03972	1.1872
618	1.1978	8.52349	0.710671	2.35635	0.597052	8.52349	1.02507	1.20432
619	1.20462	8.31645	0.735117	2.30368	0.59849	8.31645	1.03996	1.20524
620	1.21515	8.07479	0.725016	2.28203	0.599363	8.07479	1.05581	1.21522
621	1.22229	7.84428	0.720467	2.25164	0.575875	7.84428	1.0744	1.21276
622	1.23431	7.60801	0.732918	2.23056	0.610409	7.60801	1.08281	1.22639
623	1.23287	7.43079	0.736072	2.19018	0.6197	7.43079	1.11647	1.22519
624	1.24526	7.23846	0.766973	2.15075	0.617485	7.23846	1.13684	1.24727
625	1.27405	7.05577	0.782588	2.11186	0.621362	7.05577	1.17182	1.25675
626	1.27982	6.87248	0.789716	2.10145	0.633175	6.87248	1.19393	1.25661
627	1.31498	6.67172	0.775851	2.07042	0.636345	6.67172	1.21987	1.27408
628	1.33615	6.51843	0.782159	2.02492	0.620864	6.51843	1.24088	1.27086
629	1.35247	6.3321	0.781799	1.96358	0.641702	6.3321	1.23703	1.29171
630	1.36157	6.19244	0.778109	1.91687	0.645157	6.19244	1.24118	1.28474
631	1.38351	6.0049	0.795703	1.88656	0.650664	6.0049	1.25435	1.29744
632	1.38785	5.82091	0.781442	1.84601	0.658588	5.82091	1.24495	1.28859
633	1.37157	5.65576	0.793764	1.8168	0.662483	5.65576	1.28102	1.29555
634	1.39201	5.48737	0.773372	1.75714	0.664958	5.48737	1.30326	1.26016
635	1.38349	5.34721	0.787296	1.72679	0.674524	5.34721	1.31452	1.26803
636	1.4	5.21306	0.773191	1.68157	0.699393	5.21306	1.30705	1.26907
637	1.40289	5.08787	0.782105	1.67286	0.698045	5.08787	1.33042	1.27151
638	1.3894	4.99461	0.782861	1.66771	0.709384	4.99461	1.35071	1.2888
639	1.4061	4.86083	0.786273	1.63957	0.697262	4.86083	1.317	1.28998
640	1.45405	4.72064	0.814183	1.63919	0.7091	4.72064	1.34901	1.31797
641	1.4901	4.60764	0.812624	1.61608	0.729377	4.60764	1.34463	1.31455
642	1.48671	4.52333	0.802021	1.63851	0.729334	4.52333	1.35674	1.33204
643	1.47826	4.41811	0.822396	1.64211	0.738919	4.41811	1.34969	1.36472
644	1.48583	4.26344	0.826333	1.60713	0.72018	4.26344	1.3813	1.36582
645	1.50537	4.18061	0.830941	1.57884	0.710768	4.18061	1.3923	1.37131
646	1.53072	4.02787	0.860528	1.55422	0.729331	4.02787	1.42012	1.41215
647	1.50873	3.92921	0.872543	1.53877	0.73548	3.92921	1.45737	1.42998
648	1.50418	3.86428	0.852609	1.5086	0.724945	3.86428	1.45252	1.40836
649	1.52871	3.77572	0.868692	1.4907	0.731907	3.77572	1.44716	1.43335
650	1.56601	3.69749	0.910464	1.48676	0.765064	3.69749	1.48923	1.47861
651	1.60551	3.55244	0.936749	1.45003	0.798495	3.55244	1.49835	1.48334
652	1.63506	3.50043	0.939955	1.4651	0.819642	3.50043	1.50925	1.51604
653	1.66496	3.43004	0.961898	1.48918	0.82752	3.43004	1.51915	1.4936
654	1.6585	3.37435	0.982949	1.47804	0.829814	3.37435	1.56101	1.49478
655	1.66244	3.29826	0.995892	1.45544	0.855531	3.29826	1.57332	1.51699
656	1.68356	3.21545	1.01407	1.43146	0.87704	3.21545	1.62302	1.55016
657	1.6755	3.14733	1.03597	1.46311	0.865543	3.14733	1.65286	1.52898
658	1.67682	3.08827	1.03076	1.43835	0.845204	3.08827	1.67359	1.51306
659	1.68036	3.06994	1.00387	1.42539	0.807073	3.06994	1.66116	1.52163
660	1.68059	3.00406	0.988891	1.40213	0.813557	3.00406	1.7169	1.53124
661	1.67305	2.94858	0.95018	1.38245	0.825554	2.94858	1.69626	1.54559
662	1.71288	2.91954	0.932508	1.36947	0.819081	2.91954	1.68545	1.5618
663	1.75802	2.84953	0.927266	1.37126	0.77041	2.84953	1.68651	1.54792
664	1.73699	2.80309	0.918843	1.37516	0.766209	2.80309	1.6969	1.59044
665	1.75128	2.76143	0.907809	1.36236	0.756425	2.76143	1.67071	1.60703
666	1.8261	2.74146	0.946023	1.37513	0.759918	2.74146	1.68368	1.65141
667	1.79654	2.66119	0.997627	1.41071	0.746536	2.66119	1.70274	1.68315
668	1.81865	2.6531	1.00926	1.41831	0.732508	2.6531	1.69104	1.69799
669	1.85067	2.62269	1.07969	1.43756	0.73684	2.62269	1.72773	1.74767
670	1.89101	2.55807	1.09932	1.44459	0.739188	2.55807	1.73592	1.74901
671	1.93416	2.5581	1.12252	1.45737	0.804288	2.5581	1.76504	1.77072
672	2.01288	2.55238	1.1893	1.46797	0.84241	2.55238	1.75621	1.77995
673	2.03651	2.4825	1.21894	1.44206	0.856675	2.4825	1.79381	1.77231
674	2.03927	2.46947	1.23883	1.43479	0.857827	2.46947	1.79098	1.793
675	2.07225	2.43557	1.23765	1.41959	0.893842	2.43557	1.84138	1.79804
676	2.15241	2.33526	1.24366	1.43245	0.910266	2.33526	1.89183	1.82668
677	2.18078	2.37558	1.21121	1.41095	0.89729	2.37558	1.92143	1.82508
678	2.1949	2.37307	1.25951	1.42483	0.928422	2.37307	1.91065	1.8497
679	2.20525	2.35424	1.2957	1.43572	0.92435	2.35424	1.96033	1.8694
680	2.22893	2.31147	1.29164	1.42904	0.88818	2.31147	2.00906	1.89188
681	2.26325	2.27052	1.25554	1.43519	0.919071	2.27052	2.08428	1.94655
682	2.26914	2.24413	1.25829	1.47122	0.955366	2.24413	2.08643	1.97239
683	2.2976	2.23437	1.27873	1.46335	0.968089	2.23437	2.11162	2.02547
684	2.26264	2.2696	1.29953	1.51068	0.979028	2.2696	2.1283	2.09435
685	2.30585	2.20667	1.32497	1.53716	0.984717	2.20667	2.13667	2.13677
686	2.32143	2.16909	1.30173	1.60284	1.01737	2.16909	2.17237	2.17315
687	2.3686	2.13632	1.32462	1.61216	1.05858	2.13632	2.21558	2.1827
688	2.39156	2.12163	1.37282	1.65417	1.06407	2.12163	2.24762	2.19012
689	2.42934	2.11883	1.46861	1.63981	1.03855	2.11883	2.283	2.17306
690	2.46142	2.13473	1.48722	1.65477	1.00247	2.13473	2.30428	2.17822
691	2.47798	2.05961	1.4786	1.63855	0.9801	2.05961	2.39086	2.17739
692	2.463	2.06809	1.4769	1.6016	0.955035	2.06809	2.41271	2.19856
693	2.49367	2.06626	1.54827	1.58816	0.930165	2.06626	2.4952	2.18966
694	2.53675	2.11439	1.53954	1.62423	0.894337	2.11439	2.54649	2.20329
695	2.58049	2.12384	1.57658	1.6092	0.897144	2.12384	2.57555	2.2945
696	2.58426	2.09575	1.57211	1.59214	0.91336	2.09575	2.62255	2.33899
697	2.67285	2.062	1.51656	1.62153	0.93534	2.062	2.6429	2.39527
698	2.73065	2.09932	1.49892	1.63642	0.989946	2.09932	2.65881	2.44426
699	2.8023	2.08254	1.52847	1.74278	1.0849	2.08254	2.70473	2.39084
700	2.8582	2.08598	1.52239	1.77282	1.15175	2.08598	2.64732	2.50883
